# Supplementary material for: Meroterpenoids and Steroids from the Marine-Derived Fungus Trametes sp. ZYX-Z-16
Source: MDPI journal article supplement (doi:10.3390/molecules27248782), 2022-12-11
Supplement: s1 [file s1]

# Supporting Information

## Meroterpenoids and steroids from the marine-derived fungus *Trametes* sp. ZYX-Z-16

Zi Ming Ren<sup>1,†</sup>, Li Yang<sup>2,†</sup>, Qing Yun Ma<sup>2</sup>, Qing Yi Xie<sup>2</sup>, Hao Fu Dai<sup>2</sup>, Kun Lai Sun<sup>1,†</sup> and You Xing Zhao<sup>2,\*</sup>

*1 Zhejiang Provincial Engineering Technology Research Center of Marine Biomedical Products, School of Food and Pharmacy, Zhejiang Ocean University, Zhoushan 316022, China*

*2 Haikou Key Laboratory for Research and Utilization of Tropical Natural Products, Institute of Tropical Bioscience and Biotechnology, Chinese Academy of Tropical Agricultural Sciences & Hainan Key Laboratory for Protection and Utilization of Tropical Bioresources, Hainan Academy of Tropical Agricultural Resource, Haikou 571101, China*

† These authors contributed equally to this work.

\* Correspondence author.

sunqinlai@126.com (K.L.S); zhaoyouxing@itbb.org.cn (Y.X.Z.)

# Content

|                                                                                                                                                      |    |
|------------------------------------------------------------------------------------------------------------------------------------------------------|----|
| ITS1 gene sequences of <i>Trametes</i> sp. ZYX-Z-16.....                                                                                             | 4  |
| <b>Figure S1.</b> Original tree of <i>Trametes</i> sp. ZYX-Z-16.....                                                                                 | 4  |
| <b>Figure S2.</b> <sup>1</sup> H-NMR spectrum of compound <b>1</b> (500 MHz, CD <sub>3</sub> OD).....                                                | 5  |
| <b>Figure S3.</b> <sup>13</sup> C-NMR and DEPT spectra of compound <b>1</b> (125 MHz, CD <sub>3</sub> OD) .....                                      | 5  |
| <b>Figure S4.</b> HSQC spectrum of compound <b>1</b> (125 MHz, CD <sub>3</sub> OD).....                                                              | 6  |
| <b>Figure S5.</b> HMBC spectrum of compound <b>1</b> (125 MHz, CD <sub>3</sub> OD).....                                                              | 6  |
| <b>Figure S6.</b> <sup>1</sup> H- <sup>1</sup> H COSY spectrum of compound <b>1</b> (125MHz, CD <sub>3</sub> OD) .....                               | 7  |
| <b>Figure S7.</b> ROESY spectrum of compound <b>1</b> (125 MHz, CD <sub>3</sub> OD).....                                                             | 7  |
| <b>Figure S8.</b> HRESIMS of compound <b>1</b> (MeOH).....                                                                                           | 8  |
| <b>Figure S9.</b> IR spectrum of the compound <b>1</b> .....                                                                                         | 8  |
| <b>Figure S10.</b> <sup>1</sup> H-NMR spectrum of compound <b>2</b> (500 MHz, CDCl <sub>3</sub> ).....                                               | 9  |
| <b>Figure S11.</b> <sup>13</sup> C-NMR and DEPT spectra of compound <b>2</b> (125 MHz, CDCl <sub>3</sub> ).....                                      | 9  |
| <b>Figure S12.</b> HSQC spectrum of compound <b>2</b> (125 MHz, CDCl <sub>3</sub> ).....                                                             | 10 |
| <b>Figure S13.</b> HMBC spectrum of compound <b>2</b> (125 MHz, CDCl <sub>3</sub> ).....                                                             | 10 |
| <b>Figure S14.</b> <sup>1</sup> H- <sup>1</sup> H COSY spectrum of compound <b>2</b> (125MHz, CDCl <sub>3</sub> ) .....                              | 11 |
| <b>Figure S15.</b> ROESY spectrum of compound <b>2</b> (125 MHz, CDCl <sub>3</sub> ).....                                                            | 11 |
| <b>Figure S16.</b> HRESIMS of compound <b>2</b> (MeOH).....                                                                                          | 12 |
| <b>Figure S17.</b> IR spectrum of the compound <b>2</b> .....                                                                                        | 12 |
| <b>Table S1.</b> Experimental and calculated <sup>13</sup> C NMR chemical shifts of <b>1</b> . .....                                                 | 13 |
| <b>Table S2.</b> Experimental and calculated <sup>1</sup> H NMR chemical shifts of <b>1</b> .....                                                    | 13 |
| <b>Figure S18.</b> DP4+ analyses of calculated and experimental NMR chemical shifts of 20R-1 and 20S-1.....                                          | 15 |
| <b>Table S3.</b> Conformational analysis of the optimized isomers of <b>1</b> in methanol.....                                                       | 15 |
| <b>Figure S19.</b> Optimized conformers of compound <b>1</b> .....                                                                                   | 16 |
| <b>Table S4.</b> Optimized cartesian coordinates of conformers of (5R,7S,8S,9S,10S,1'R,5'S,6'S)- <b>1</b> at B3LYP/6-311G(d) level in methanol.....  | 16 |
| <b>Table S5.</b> Optimized cartesian coordinates of conformers of (5R,7S,8S,9S,10S,1'S,5'R,6'R)- <b>1</b> at B3LYP/6-311G(d) level in methanol. .... | 18 |

|                                                                                                                                           |    |
|-------------------------------------------------------------------------------------------------------------------------------------------|----|
| <b>Table S6.</b> Conformational analysis of the optimized isomers of <b>2</b> in chloroform.....                                          | 20 |
| <b>Figure S20.</b> Optimized conformers of compound <b>2</b> .....                                                                        | 20 |
| <b>Table S7.</b> Optimized cartesian coordinates of conformers of <b>2</b> at B3LYP/6-311G(d) level in chloroform.....                    | 20 |
| <b>Table S8.</b> $\alpha$ -Glucosidase and acetylcholinesterase inhibitory activities of all compounds (IC <sub>50</sub> , $\mu$ M) ..... | 24 |
| <b>Table S9.</b> Antibacterial activities of all compounds MIC ( $\mu$ g/mL) .....                                                        | 24 |
| <b>Table S10.</b> Antifungal activities of all compounds MIC ( $\mu$ g/mL).....                                                           | 25 |

ITS1 gene sequences of *Trametes* sp. ZYX-Z-16

GGCCTACGAGTGCGGGACTCGCGGTACCTCCCACCCGTGTCTCTCTCTAC  
CTGTTGCTTTGGCGGGCCACCGGGGCCACCCGGTCGCCGGGGGACGTCG  
TCCCCGGGCCCCGCGCCCCGCCGAAGCGCTCTGTGAACCCTGATGAAGATGG  
GCTGTCTGAGTCGAATGAAAATTGTCAAACTTTCAACAATGGATCTCTTG  
GTTCCGGCATCGATGAAGAACGCAGCGAAATGCGATAAGTAATGTGAATTG  
CAGAATTCCGTGAATCATCGAATCTTTGAACGCACATTGCGCCCCCTGGCAT  
TCCGGGGGGCATGCCTGTCCGAGCGTCATTTCTGCCCTCAAGCCCCGGCTTG  
TGTGTTGGGCGTGGTCCCCCGGGGACCTGCCCGAAAGGCAGCGGCGACG  
TCCGTCTGGTCCTCGAGCGTATGGGGCTCTGTCACTCGCTCGGGACGGATC  
GGCGGAGGTTGGTCACCACCACAGTTTACCACGGTTGACCTCGGATCAG  
GTAGGAGTTACCCGCTGAACTTAAGCATATCAAAG

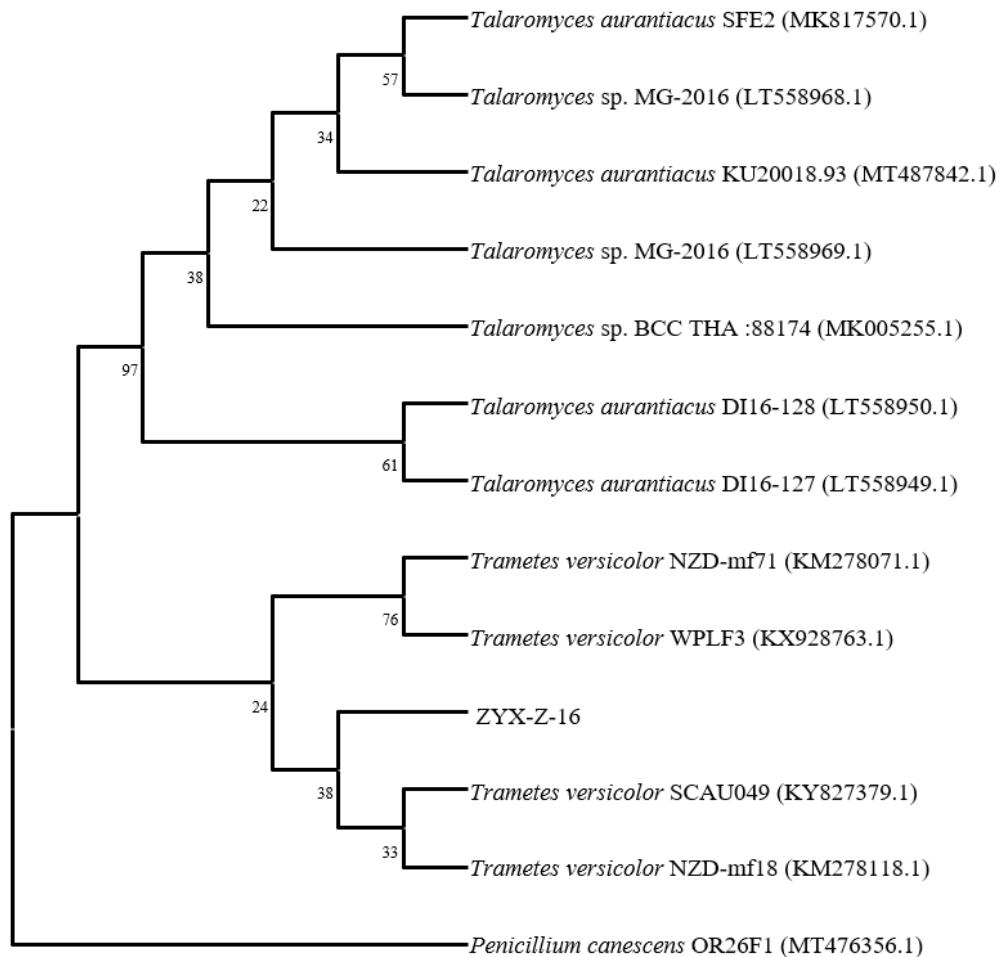

**Figure S1.** Original tree of *Trametes* sp. ZYX-Z-16

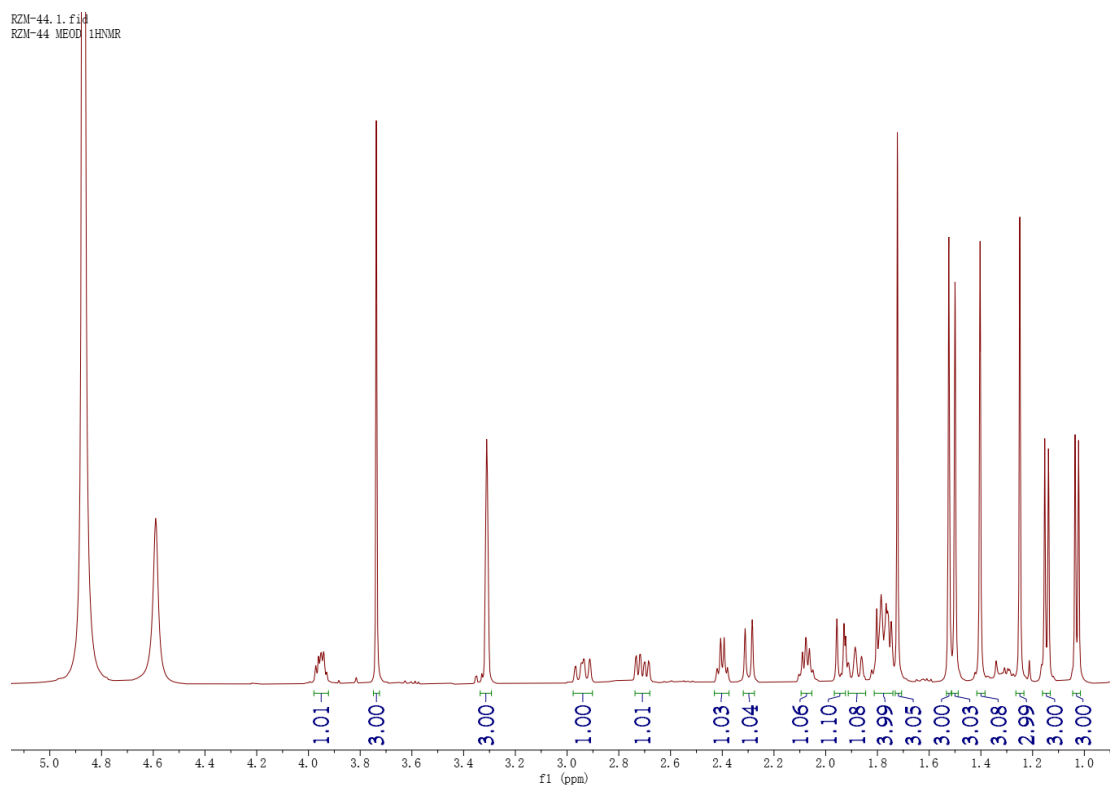

**Figure S2.**  $^1\text{H}$ -NMR spectrum of compound **1** (500 MHz,  $\text{CD}_3\text{OD}$ )

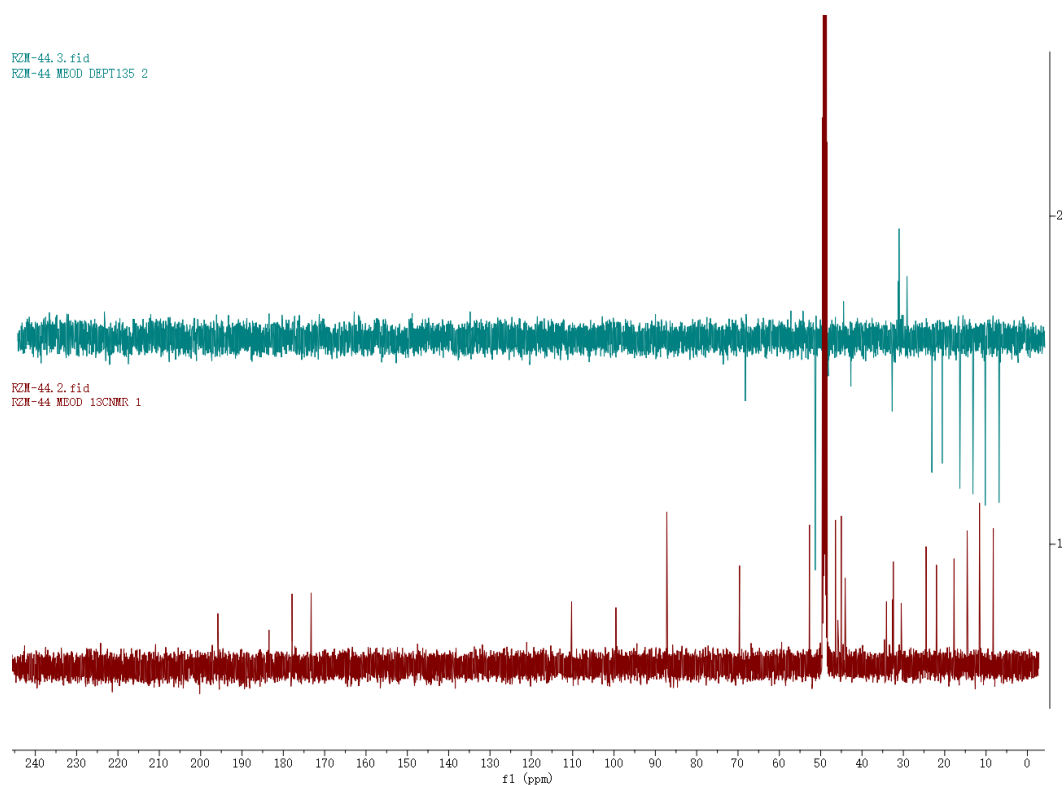

**Figure S3.**  $^{13}\text{C}$ -NMR and DEPT spectra of compound **1** (125 MHz,  $\text{CD}_3\text{OD}$ )

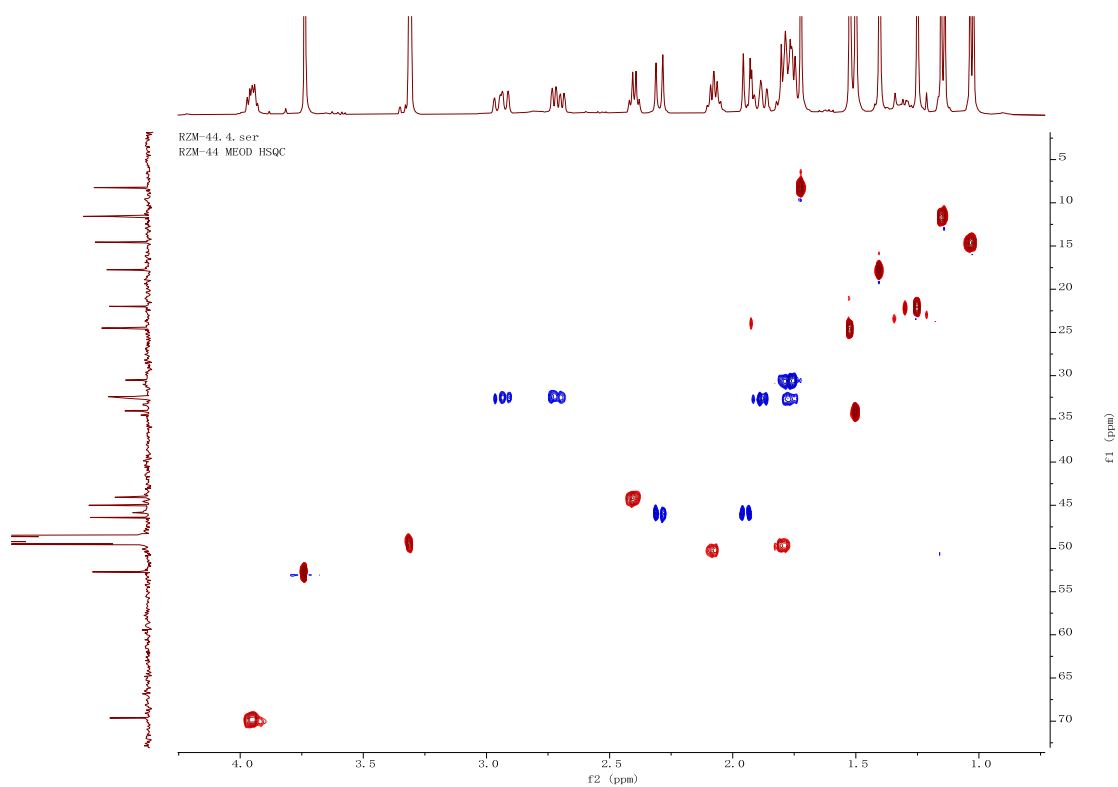

**Figure S4.** HSQC spectrum of compound **1** (125 MHz, CD<sub>3</sub>OD)

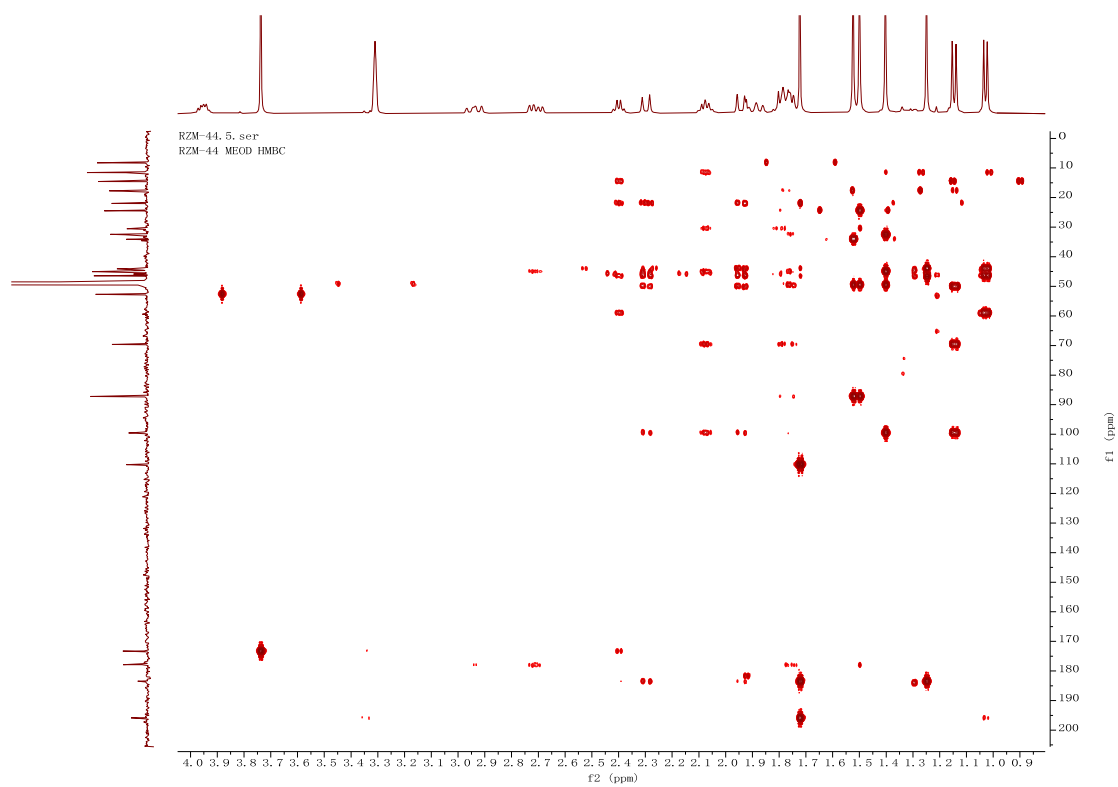

**Figure S5.** HMBC spectrum of compound **1** (125 MHz, CD<sub>3</sub>OD)

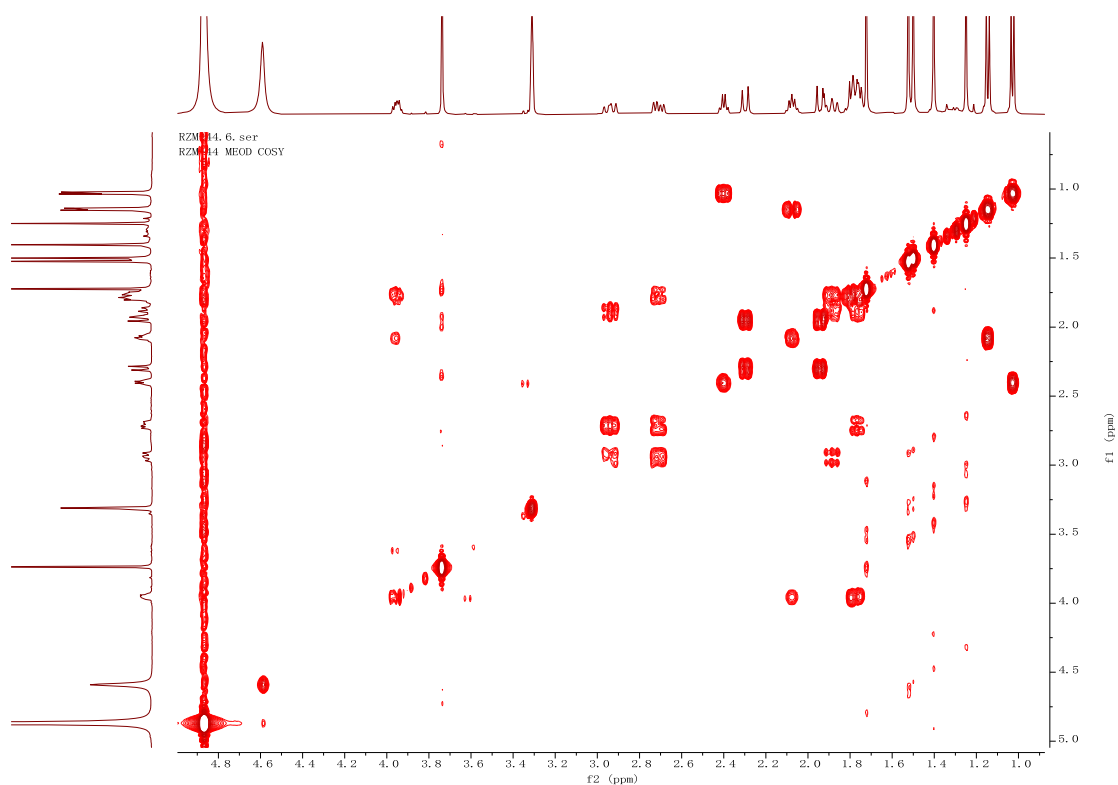

**Figure S6.**  $^1\text{H}$ - $^1\text{H}$  COSY spectrum of compound **1** (125MHz,  $\text{CD}_3\text{OD}$ )

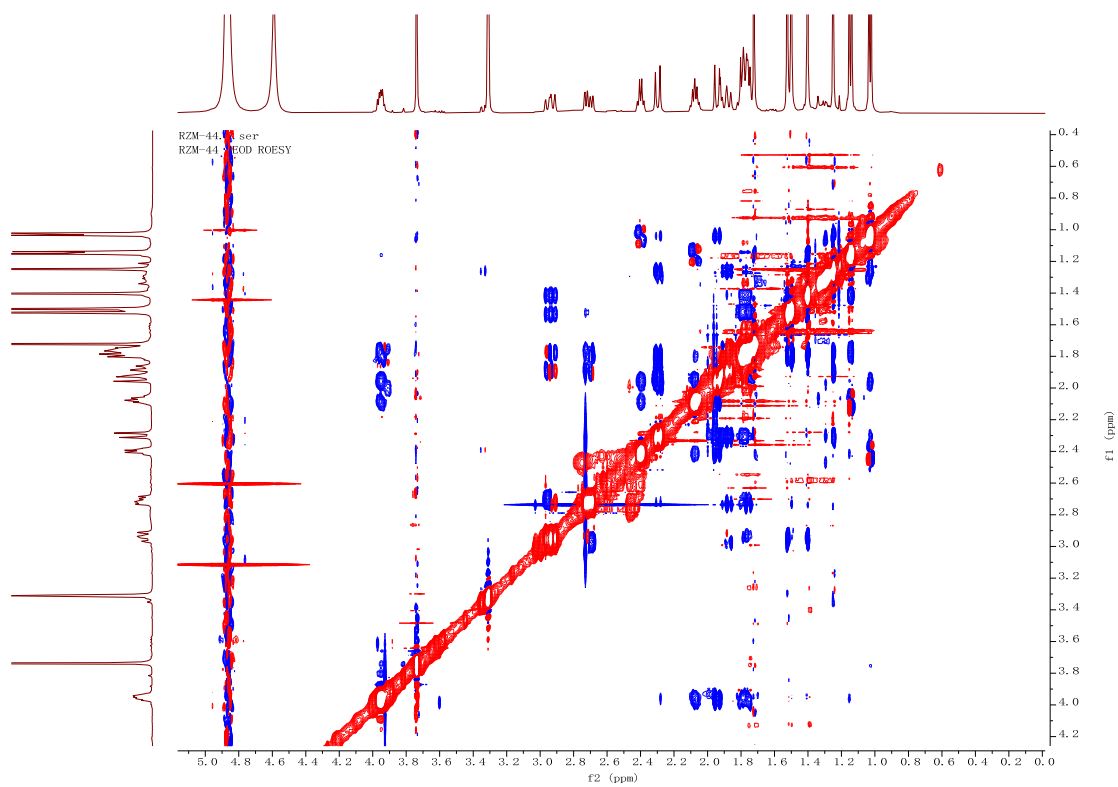

**Figure S7.** ROESY spectrum of compound **1** (125 MHz,  $\text{CD}_3\text{OD}$ )

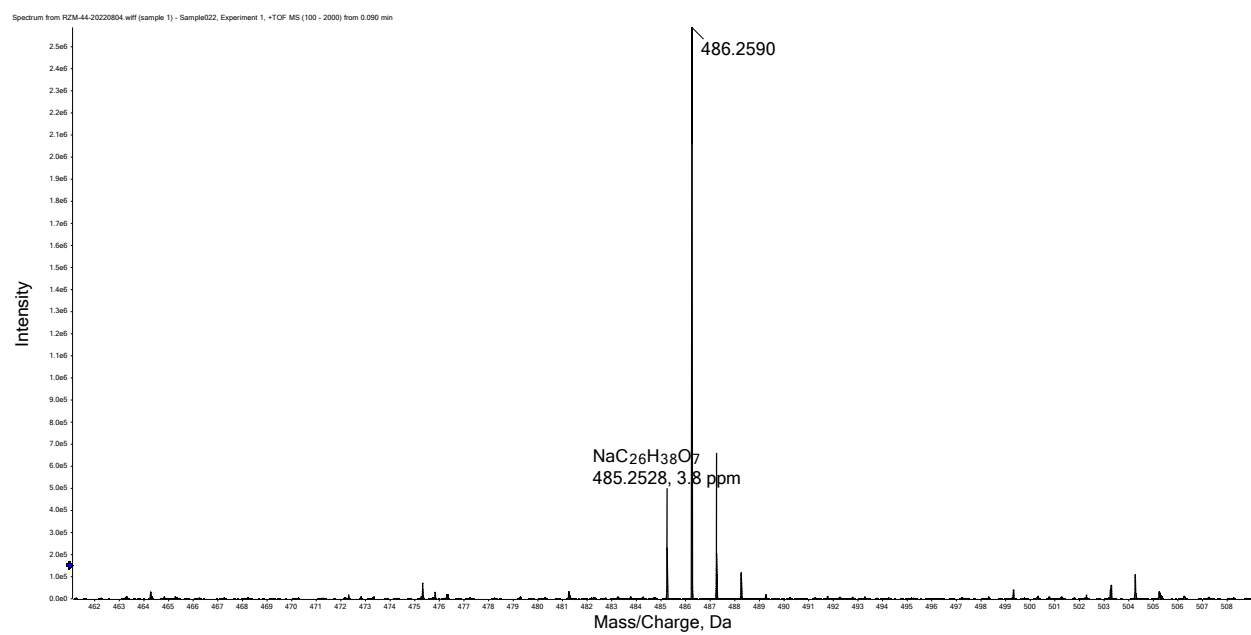

| Hit | Formula                                        | m/z      | RDB | ppm | MS Rank | MSMS ppm | MSMS Rank | Found |
|-----|------------------------------------------------|----------|-----|-----|---------|----------|-----------|-------|
| 1   | C <sub>26</sub> H <sub>38</sub> O <sub>7</sub> | 485.2510 | 8.0 | 3.8 | 1       |          |           | NA/NA |

**Figure S8.** HRESIMS of compound **1** (MeOH)

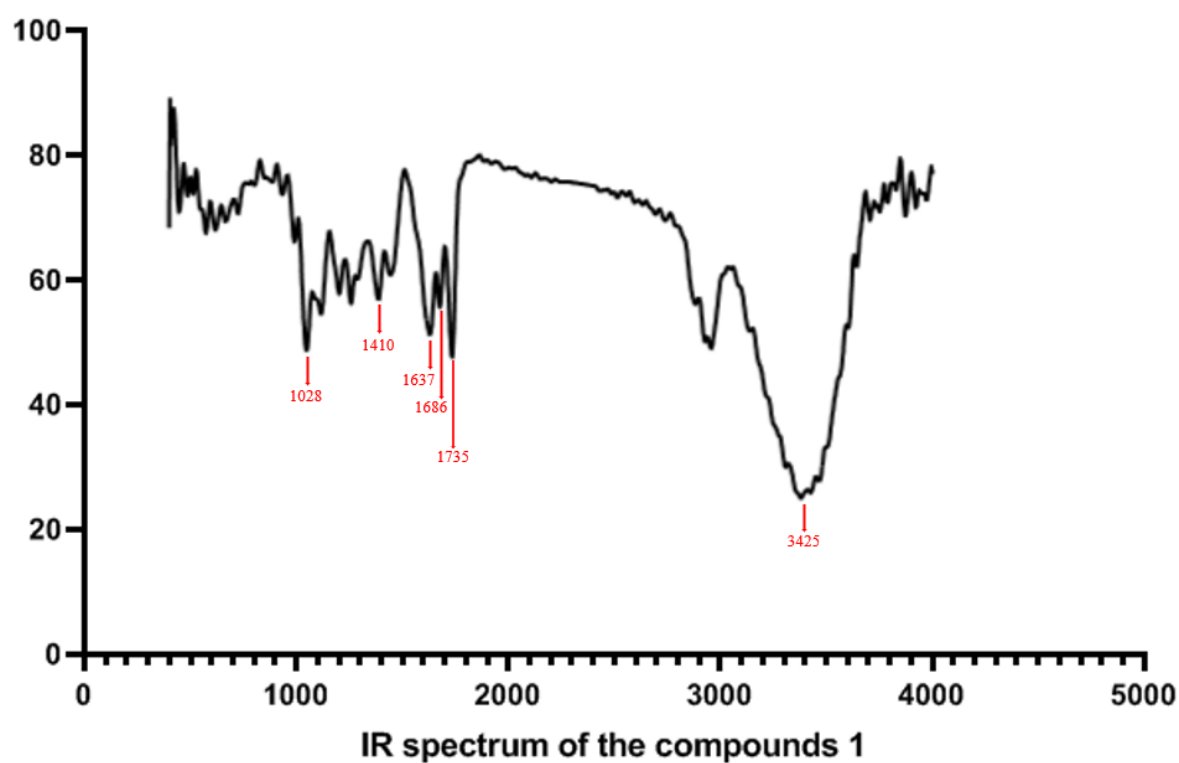

**Figure S9.** IR spectrum of the compound **1**



R2M-31-1二维. 1.fid  
R2M-31-1 CDCL3 1H NMR

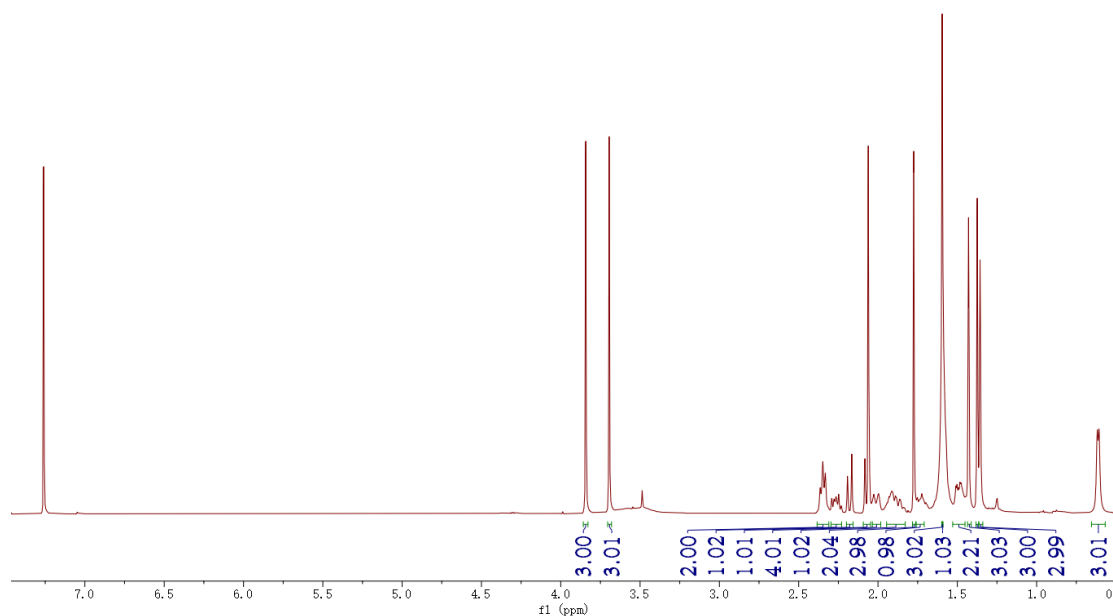

**Figure S10.**  $^1\text{H}$ -NMR spectrum of compound **2** (500 MHz,  $\text{CDCl}_3$ )

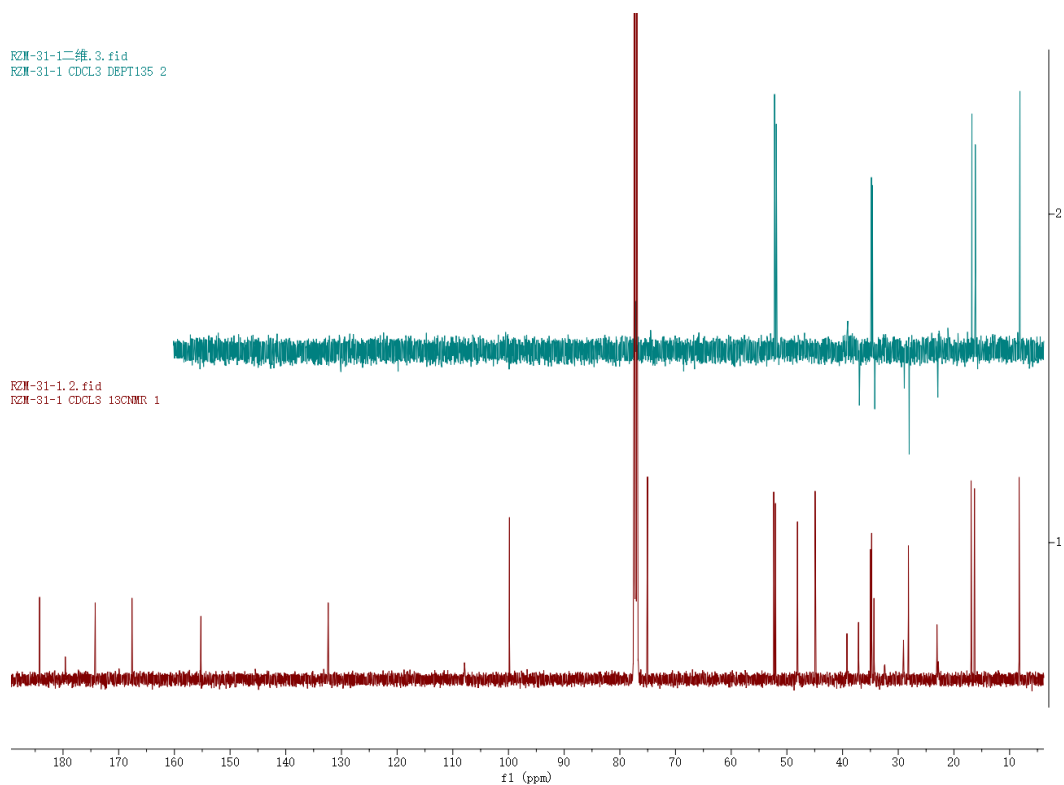

**Figure S11.**  $^{13}\text{C}$ -NMR and DEPT spectra of compound **2** (125 MHz,  $\text{CDCl}_3$ )

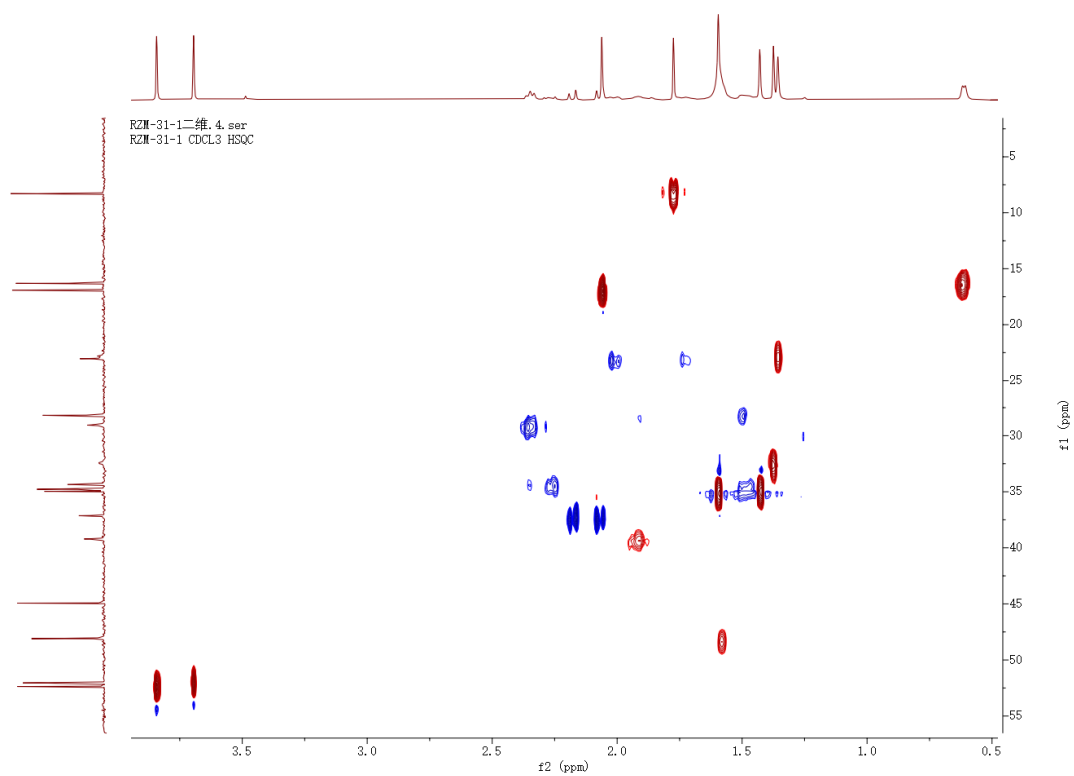

**Figure S12.** HSQC spectrum of compound **2** (125 MHz, CDCl<sub>3</sub>)

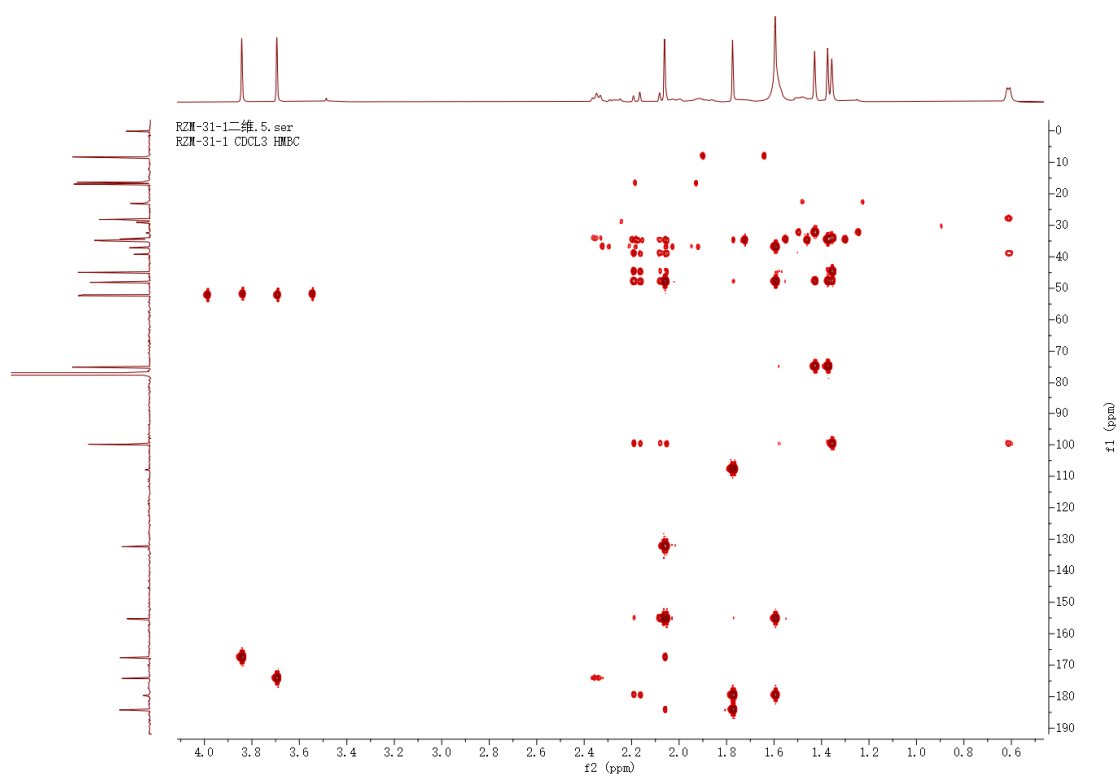

**Figure S13.** HMBC spectrum of compound **2** (125 MHz, CDCl<sub>3</sub>)

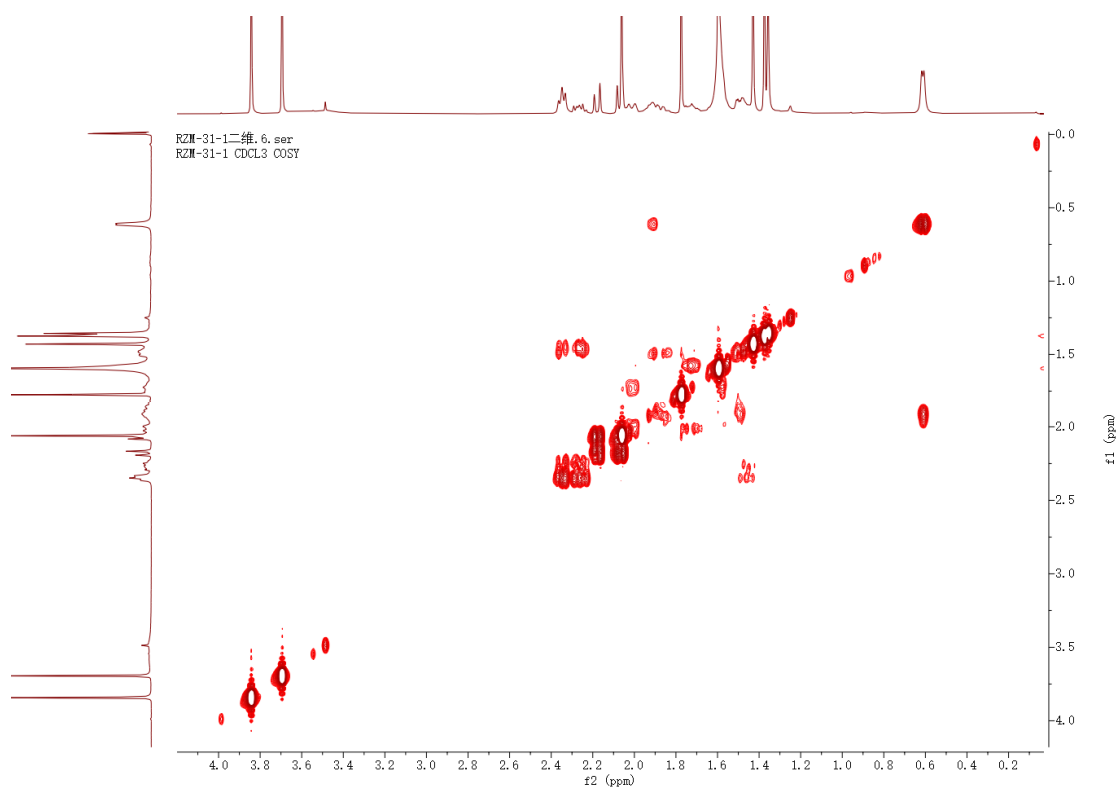

**Figure S14.**  $^1\text{H}$ - $^1\text{H}$  COSY spectrum of compound **2** (125MHz,  $\text{CDCl}_3$ )

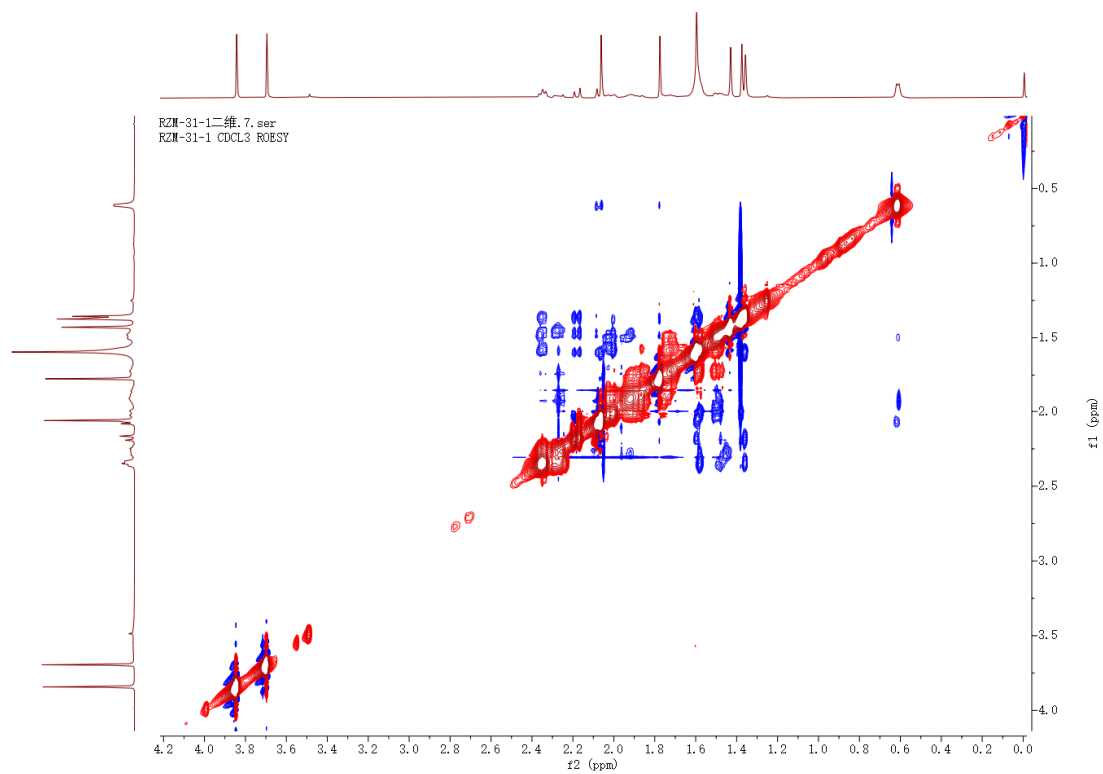

**Figure S15.** ROESY spectrum of compound **2** (125 MHz,  $\text{CDCl}_3$ )

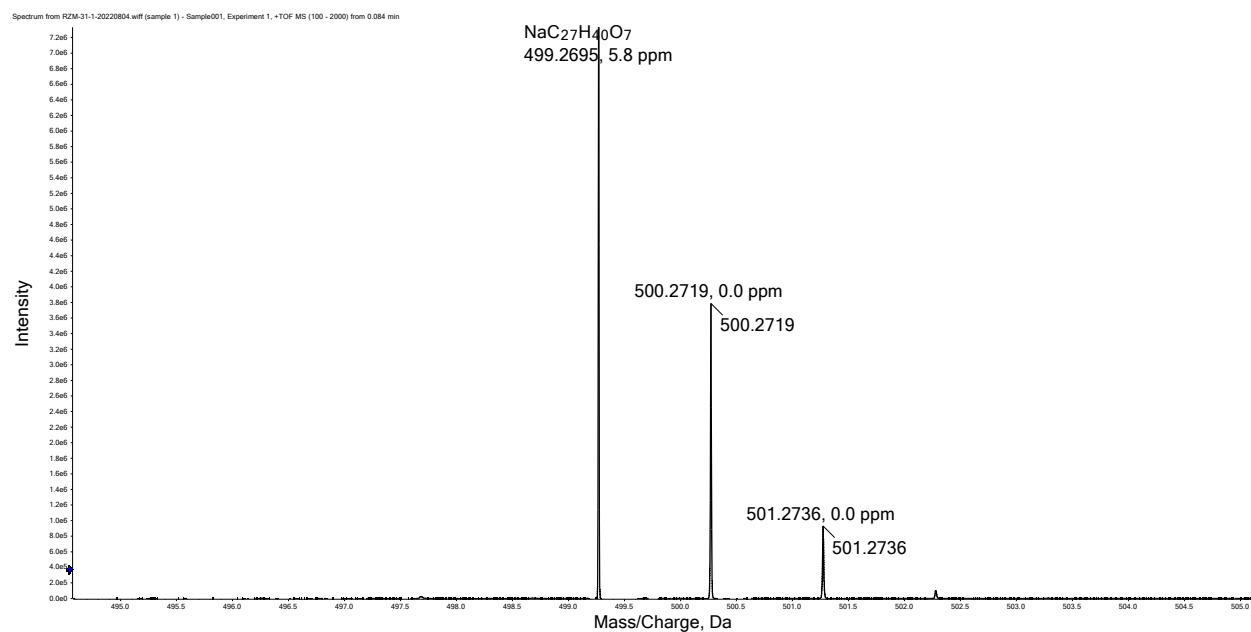

| Hit | Formula                                        | m/z      | RDB | ppm | MS Rank | MSMS ppm | MSMS Rank | Found |
|-----|------------------------------------------------|----------|-----|-----|---------|----------|-----------|-------|
| 1   | C <sub>27</sub> H <sub>40</sub> O <sub>7</sub> | 499.2666 | 8.0 | 5.8 | 1       |          |           | NA/NA |

**Figure S16.** HRESIMS of compound **2** (MeOH)

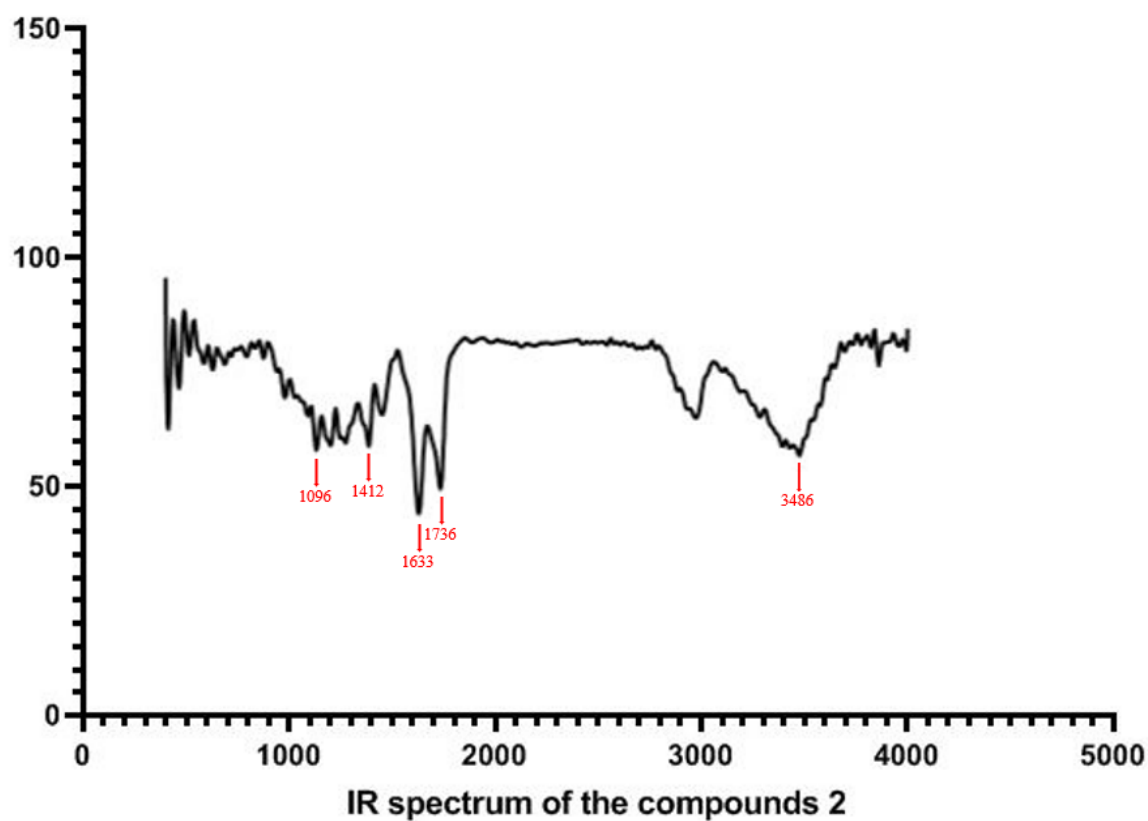

**Figure S17.** IR spectrum of the compound **2**

**Table S1.** Experimental and calculated <sup>13</sup>C NMR chemical shifts of **1**.

| No.                  | Experi<br>mental<br><br>( $\delta_C$ ,<br>ppm) | Calculated ( $\delta_C$ , ppm)                                                                                      |                                                                                                                     | Corrected ( $\delta_C$ , ppm)                                                                                       |                                                                                                                     |
|----------------------|------------------------------------------------|---------------------------------------------------------------------------------------------------------------------|---------------------------------------------------------------------------------------------------------------------|---------------------------------------------------------------------------------------------------------------------|---------------------------------------------------------------------------------------------------------------------|
|                      |                                                | (5 <i>R</i> ,7 <i>S</i> ,8 <i>S</i> ,9 <i>S</i> ,10 <i>S</i> ,<br>1' <i>R</i> ,5' <i>S</i> ,6' <i>S</i> )- <b>1</b> | (5 <i>R</i> ,7 <i>S</i> ,8 <i>S</i> ,9 <i>S</i> ,10 <i>S</i> ,<br>1' <i>S</i> ,5' <i>R</i> ,6' <i>R</i> )- <b>1</b> | (5 <i>R</i> ,7 <i>S</i> ,8 <i>S</i> ,9 <i>S</i> ,10 <i>S</i> ,<br>1' <i>R</i> ,5' <i>S</i> ,6' <i>S</i> )- <b>1</b> | (5 <i>R</i> ,7 <i>S</i> ,8 <i>S</i> ,9 <i>S</i> ,10 <i>S</i> ,<br>1' <i>S</i> ,5' <i>R</i> ,6' <i>R</i> )- <b>1</b> |
| 1                    | 32.6                                           | 33.6                                                                                                                | 32.7                                                                                                                | 31.8                                                                                                                | 30.9                                                                                                                |
| 2                    | 32.4                                           | 34.6                                                                                                                | 34.8                                                                                                                | 32.9                                                                                                                | 33.0                                                                                                                |
| 3                    | 177.9                                          | 173.5                                                                                                               | 173.2                                                                                                               | 175.9                                                                                                               | 175.9                                                                                                               |
| 4                    | 87.2                                           | 87.9                                                                                                                | 87.7                                                                                                                | 87.8                                                                                                                | 87.6                                                                                                                |
| 5                    | 49.3                                           | 50.5                                                                                                                | 49.7                                                                                                                | 49.2                                                                                                                | 48.4                                                                                                                |
| 6                    | 30.5                                           | 31.4                                                                                                                | 32.3                                                                                                                | 29.6                                                                                                                | 30.4                                                                                                                |
| 7                    | 69.6                                           | 71.5                                                                                                                | 72.6                                                                                                                | 70.9                                                                                                                | 72.0                                                                                                                |
| 8                    | 50.1                                           | 53.2                                                                                                                | 50.9                                                                                                                | 52.0                                                                                                                | 49.7                                                                                                                |
| 9                    | 99.5                                           | 100.4                                                                                                               | 99.8                                                                                                                | 100.6                                                                                                               | 100.1                                                                                                               |
| 10                   | 45                                             | 47.7                                                                                                                | 51.0                                                                                                                | 46.4                                                                                                                | 49.7                                                                                                                |
| 11                   | 45.9                                           | 46.7                                                                                                                | 46.8                                                                                                                | 45.4                                                                                                                | 45.4                                                                                                                |
| 12                   | 11.6                                           | 13.4                                                                                                                | 13.0                                                                                                                | 11.1                                                                                                                | 10.5                                                                                                                |
| 13                   | 17.7                                           | 18.7                                                                                                                | 19.7                                                                                                                | 16.5                                                                                                                | 17.4                                                                                                                |
| 14                   | 34.1                                           | 34.8                                                                                                                | 35.1                                                                                                                | 33.1                                                                                                                | 33.3                                                                                                                |
| 15                   | 24.5                                           | 24.3                                                                                                                | 24.5                                                                                                                | 22.2                                                                                                                | 22.3                                                                                                                |
| 1'                   | 46.4                                           | 49.4                                                                                                                | 50.5                                                                                                                | 48.1                                                                                                                | 49.2                                                                                                                |
| 2'                   | 183.4                                          | 181.2                                                                                                               | 181.9                                                                                                               | 183.9                                                                                                               | 184.8                                                                                                               |
| 3'                   | 110.2                                          | 109.9                                                                                                               | 107.5                                                                                                               | 110.5                                                                                                               | 108.1                                                                                                               |
| 4'                   | 195.8                                          | 191.8                                                                                                               | 191.9                                                                                                               | 194.8                                                                                                               | 195.2                                                                                                               |
| 5'                   | 59.4                                           | 60.6                                                                                                                | 60.2                                                                                                                | 59.7                                                                                                                | 59.2                                                                                                                |
| 6'                   | 44.1                                           | 46.6                                                                                                                | 44.4                                                                                                                | 45.2                                                                                                                | 42.9                                                                                                                |
| 7'                   | 22                                             | 22.5                                                                                                                | 23.9                                                                                                                | 20.5                                                                                                                | 21.8                                                                                                                |
| 8'                   | 8.2                                            | 12.0                                                                                                                | 11.9                                                                                                                | 9.6                                                                                                                 | 9.4                                                                                                                 |
| 9'                   | 173.3                                          | 171.3                                                                                                               | 171.5                                                                                                               | 173.7                                                                                                               | 174.1                                                                                                               |
| 10'                  | 14.6                                           | 16.0                                                                                                                | 16.2                                                                                                                | 13.7                                                                                                                | 13.8                                                                                                                |
| 11'                  | 52.7                                           | 53.9                                                                                                                | 54.2                                                                                                                | 52.8                                                                                                                | 53.0                                                                                                                |
| <b>R<sup>2</sup></b> |                                                | <b>0.9996</b>                                                                                                       | <b>0.9992</b>                                                                                                       |                                                                                                                     |                                                                                                                     |
| <b>MAE</b>           |                                                | <b>1.75</b>                                                                                                         | <b>1.89</b>                                                                                                         |                                                                                                                     |                                                                                                                     |
| <b>E</b>             |                                                |                                                                                                                     |                                                                                                                     |                                                                                                                     |                                                                                                                     |
| <b>CM</b>            |                                                |                                                                                                                     |                                                                                                                     | <b>0.97</b>                                                                                                         | <b>1.17</b>                                                                                                         |
| <b>AE</b>            |                                                |                                                                                                                     |                                                                                                                     |                                                                                                                     |                                                                                                                     |

**Table S2.** Experimental and calculated <sup>1</sup>H NMR chemical shifts of **1**.

| No. | Experi<br>mental<br><br>( $\delta_H$ ,<br>ppm) | Calculated ( $\delta_H$ , ppm)                                                                                      |                                                                                                                     | Corrected ( $\delta_H$ , ppm)                                                                                       |                                                                                                                     |
|-----|------------------------------------------------|---------------------------------------------------------------------------------------------------------------------|---------------------------------------------------------------------------------------------------------------------|---------------------------------------------------------------------------------------------------------------------|---------------------------------------------------------------------------------------------------------------------|
|     |                                                | (5 <i>R</i> ,7 <i>S</i> ,8 <i>S</i> ,9 <i>S</i> ,10 <i>S</i> ,<br>1' <i>R</i> ,5' <i>S</i> ,6' <i>S</i> )- <b>1</b> | (5 <i>R</i> ,7 <i>S</i> ,8 <i>S</i> ,9 <i>S</i> ,10 <i>S</i> ,<br>1' <i>S</i> ,5' <i>R</i> ,6' <i>R</i> )- <b>1</b> | (5 <i>R</i> ,7 <i>S</i> ,8 <i>S</i> ,9 <i>S</i> ,10 <i>S</i> ,<br>1' <i>R</i> ,5' <i>S</i> ,6' <i>S</i> )- <b>1</b> | (5 <i>R</i> ,7 <i>S</i> ,8 <i>S</i> ,9 <i>S</i> ,10 <i>S</i> ,<br>1' <i>S</i> ,5' <i>R</i> ,6' <i>R</i> )- <b>1</b> |
| 1a  | 1.87                                           | 1.67                                                                                                                | 1.38                                                                                                                | 1.75                                                                                                                | 1.44                                                                                                                |

|                      |      |               |               |             |             |
|----------------------|------|---------------|---------------|-------------|-------------|
| 1b                   | 1.77 | 1.60          | 1.53          | 1.68        | 1.58        |
| 2a                   | 2.94 | 2.65          | 2.94          | 2.71        | 2.94        |
| 2b                   | 2.71 | 2.52          | 2.44          | 2.58        | 2.46        |
| 5                    | 1.8  | 1.76          | 1.65          | 1.83        | 1.70        |
| 6                    | 1.77 | 1.79          | 1.68          | 1.86        | 1.73        |
| 7                    | 3.95 | 4.07          | 4.00          | 4.10        | 3.96        |
| 8                    | 2.07 | 2.00          | 2.53          | 2.07        | 2.55        |
| 11a                  | 2.3  | 1.97          | 2.26          | 2.04        | 2.28        |
| 11b                  | 1.94 | 1.85          | 1.78          | 1.93        | 1.83        |
| 12                   | 1.14 | 1.05          | 1.24          | 1.14        | 1.30        |
| 13                   | 1.4  | 1.33          | 1.38          | 1.41        | 1.44        |
| 14                   | 1.5  | 1.41          | 1.48          | 1.49        | 1.53        |
| 15                   | 1.52 | 1.46          | 1.44          | 1.54        | 1.49        |
| 5'                   | 3.34 | 3.22          | 3.35          | 3.27        | 3.34        |
| 6'                   | 2.4  | 2.56          | 2.53          | 2.61        | 2.55        |
| 7'                   | 1.25 | 1.19          | 1.28          | 1.28        | 1.34        |
| 8'                   | 1.72 | 1.80          | 1.76          | 1.87        | 1.81        |
| 10'                  | 1.03 | 0.90          | 0.95          | 0.99        | 1.03        |
| 11'                  | 3.74 | 3.77          | 3.88          | 3.81        | 3.85        |
| <b>R<sup>2</sup></b> |      | <b>0.9798</b> | <b>0.9561</b> |             |             |
| <b>MA</b>            |      | <b>0.11</b>   | <b>0.13</b>   |             |             |
| <b>E</b>             |      |               |               |             |             |
| <b>CM</b>            |      |               |               | <b>0.09</b> | <b>0.12</b> |
| <b>AE</b>            |      |               |               |             |             |

---

| Functional<br>mPW91 |      | Solvent?<br>PCM | Basis Set<br>6-31+G(d,p) |            | Type of Data<br>Unscaled Shifts |          |
|---------------------|------|-----------------|--------------------------|------------|---------------------------------|----------|
|                     |      | DP4+            | 100.00%                  | 0.00%      | -                               | -        |
| Nuclei              | sp2? | Experiment      | Isomer 1                 | Isomer 2   | Isomer 3                        | Isomer 4 |
| C                   |      | 32.4            | 33.6                     | 32.7       |                                 |          |
| C                   |      | 30.5            | 34.6                     | 34.8       |                                 |          |
| C                   | x    | 177.9           | 173.5                    | 173.2      |                                 |          |
| C                   |      | 87.2            | 87.9                     | 87.7       |                                 |          |
| C                   |      | 49.3            | 50.5                     | 49.7       |                                 |          |
| C                   |      | 32.6            | 31.4                     | 32.3       |                                 |          |
| C                   |      | 69.6            | 71.5                     | 72.6       |                                 |          |
| C                   |      | 50.1            | 53.2                     | 50.9       |                                 |          |
| C                   |      | 99.5            | 100.4                    | 99.8       |                                 |          |
| C                   |      | 45              | 47.7                     | 51.0       |                                 |          |
| C                   |      | 45.9            | 46.7                     | 46.8       |                                 |          |
| C                   |      | 11.6            | 13.44                    | 13.01      |                                 |          |
| C                   |      | 17.7            | 18.68                    | 19.88      |                                 |          |
| C                   |      | 24.1            | 24.81                    | 25.10      |                                 |          |
| C                   |      | 24.5            | 24.28                    | 24.46      |                                 |          |
| C                   |      | 46.4            | 49.39                    | 50.47      |                                 |          |
| C                   | x    | 183.4           | 181.24                   | 181.85     |                                 |          |
| C                   | x    | 110.2           | 109.91                   | 107.53     |                                 |          |
| C                   | x    | 195.8           | 191.82                   | 191.90     |                                 |          |
| C                   |      | 59.4            | 50.58                    | 60.21      |                                 |          |
| C                   |      | 44.1            | 46.57                    | 44.40      |                                 |          |
| C                   |      | 22              | 22.53                    | 23.94      |                                 |          |
| C                   |      | 8.2             | 11.97                    | 11.92      |                                 |          |
| C                   | x    | 173.3           | 171.35                   | 171.52     |                                 |          |
| C                   |      | 14.6            | 15.96                    | 16.17      |                                 |          |
| C                   |      | 52.7            | 53.938605                | 54.187539  |                                 |          |
| H                   |      | 1.77            | 1.8390211                | 1.4536492  |                                 |          |
| H                   |      | 2.94            | 2.8486251                | 2.9381852  |                                 |          |
| H                   |      | 2.71            | 2.5196001                | 2.441481   |                                 |          |
| H                   |      | 1.77            | 1.7550989                | 1.65251    |                                 |          |
| H                   |      | 1.87            | 1.8451717                | 1.8729422  |                                 |          |
| H                   |      | 1.73            | 1.746034                 | 1.6931598  |                                 |          |
| H                   |      | 3.95            | 4.0708507                | 3.993408   |                                 |          |
| H                   |      | 2.07            | 2.0001416                | 2.5293652  |                                 |          |
| H                   |      | 2.3             | 1.9656205                | 2.2574624  |                                 |          |
| H                   |      | 1.94            | 1.3518999                | 1.7843574  |                                 |          |
| H                   |      | 1.14            | 1.5053817                | 1.23715373 |                                 |          |
| H                   |      | 1.4             | 1.3258759                | 1.3540432  |                                 |          |
| H                   |      | 1.3             | 1.40914513               | 1.47910367 |                                 |          |
| H                   |      | 1.52            | 1.45950803               | 1.43854627 |                                 |          |
| H                   |      | 3.34            | 3.2230952                | 3.3467094  |                                 |          |
| H                   |      | 2.4             | 2.3552764                | 2.530666   |                                 |          |
| H                   |      | 1.25            | 1.18921847               | 1.23250947 |                                 |          |
| H                   |      | 1.72            | 1.59902092               | 1.76522987 |                                 |          |
| H                   |      | 1.03            | 0.89979063               | 0.9529562  |                                 |          |
| H                   |      | 3.74            | 3.7705932                | 3.98055287 |                                 |          |

  

| Functional<br>mPW91 |         | Solvent?<br>PCM | Basis Set<br>6-31+G(d,p) |          | Type of Data<br>Unscaled Shifts |          |
|---------------------|---------|-----------------|--------------------------|----------|---------------------------------|----------|
|                     |         | Isomer 1        | Isomer 2                 | Isomer 3 | Isomer 4                        | Isomer 5 |
| nDP4+ (H data)      | 98.69%  | 1.31%           | -                        | -        | -                               | -        |
| nDP4+ (C data)      | 98.61%  | 1.33%           | -                        | -        | -                               | -        |
| nDP4+ (all data)    | 99.98%  | 0.02%           | -                        | -        | -                               | -        |
| uDP4+ (H data)      | 91.98%  | 8.02%           | -                        | -        | -                               | -        |
| uDP4+ (C data)      | 99.20%  | 0.80%           | -                        | -        | -                               | -        |
| uDP4+ (all data)    | 99.93%  | 0.07%           | -                        | -        | -                               | -        |
| DP4+ (H data)       | 99.89%  | 0.12%           | -                        | -        | -                               | -        |
| DP4+ (C data)       | 99.99%  | 0.01%           | -                        | -        | -                               | -        |
| DP4+ (all data)     | 100.00% | 0.00%           | -                        | -        | -                               | -        |

**Figure S18.** DP4+ analyses of calculated and experimental NMR chemical shifts of **20R-1** and **20S-1**.

**Table S3.** Conformational analysis of the optimized isomers of **1** in methanol.

| Conformations                                                                                                                 | <i>G</i><br>(hartree) | $\Delta G$<br>(kcal/mol) | Boltzmann<br>distributions (%) |
|-------------------------------------------------------------------------------------------------------------------------------|-----------------------|--------------------------|--------------------------------|
| (5 <i>R</i> ,7 <i>S</i> ,8 <i>S</i> ,9 <i>S</i> ,10 <i>S</i> ,1' <i>'</i><br><i>R</i> ,5' <i>S</i> ,6' <i>S</i> )- <b>1-1</b> | -1540.278906          | 0                        | 47.9                           |
| (5 <i>R</i> ,7 <i>S</i> ,8 <i>S</i> ,9 <i>S</i> ,10 <i>S</i> ,1' <i>'</i><br><i>R</i> ,5' <i>S</i> ,6' <i>S</i> )- <b>1-2</b> | -1540.278754          | 0.095695                 | 40.7                           |
| (5 <i>R</i> ,7 <i>S</i> ,8 <i>S</i> ,9 <i>S</i> ,10 <i>S</i> ,1' <i>'</i><br><i>R</i> ,5' <i>S</i> ,6' <i>S</i> )- <b>1-3</b> | -1540.277548          | 0.852103                 | 11.4                           |
| (5 <i>R</i> ,7 <i>S</i> ,8 <i>S</i> ,9 <i>S</i> ,10 <i>S</i> ,1' <i>'S</i><br>,5' <i>R</i> ,6' <i>R</i> )- <b>1-1</b>         | -1540.280724          | 0                        | 34.1                           |

|                                                                                                              |              |             |      |
|--------------------------------------------------------------------------------------------------------------|--------------|-------------|------|
| (5 <i>R</i> ,7 <i>S</i> ,8 <i>S</i> ,9 <i>S</i> ,10 <i>S</i> ,1' <i>S</i><br>,5' <i>R</i> ,6' <i>R</i> )-1-2 | -1540.280635 | 0.056413149 | 31.1 |
| (5 <i>R</i> ,7 <i>S</i> ,8 <i>S</i> ,9 <i>S</i> ,10 <i>S</i> ,1' <i>S</i><br>,5' <i>R</i> ,6' <i>R</i> )-1-3 | -1540.2804   | 0.203752497 | 24.2 |
| (5 <i>R</i> ,7 <i>S</i> ,8 <i>S</i> ,9 <i>S</i> ,10 <i>S</i> ,1' <i>S</i><br>,5' <i>R</i> ,6' <i>R</i> )-1-4 | -1540.279625 | 0.690072747 | 10.6 |

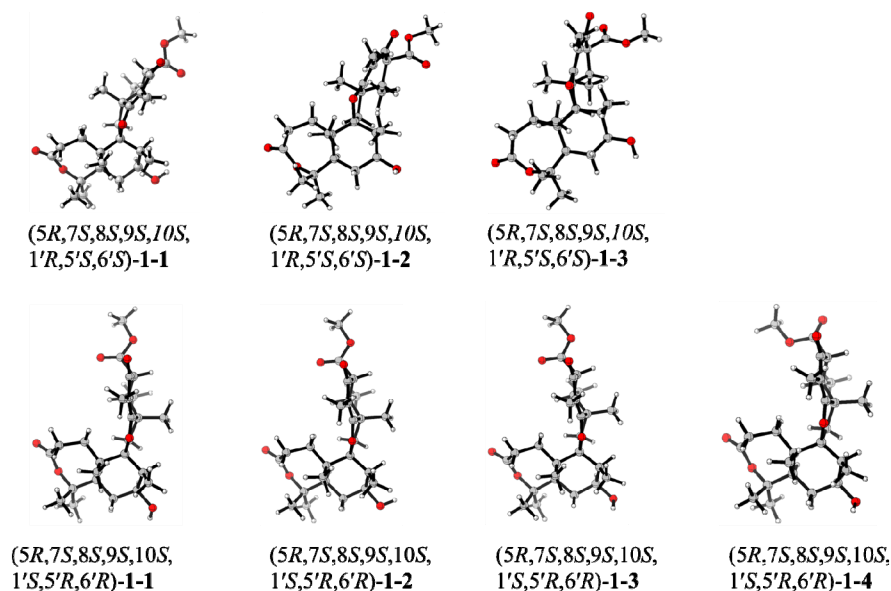

**Figure S19.** Optimized conformers of compound **1**

**Table S4.** Optimized cartesian coordinates of conformers of (5*R*,7*S*,8*S*,9*S*,10*S*,1'*R*,5'*S*,6'*S*)-1 at B3LYP/6-311G(d) level in methanol.

|   | (5 <i>R</i> ,7 <i>S</i> ,8 <i>S</i> ,9 <i>S</i> ,10 <i>S</i> ,1' <i>R</i> ,5' <i>S</i> ,6' <i>S</i> )-1-1 |          |          | (5 <i>R</i> ,7 <i>S</i> ,8 <i>S</i> ,9 <i>S</i> ,10 <i>S</i> ,1' <i>R</i> ,5' <i>S</i> ,6' <i>S</i> )-1-2 |          |          | (5 <i>R</i> ,7 <i>S</i> ,8 <i>S</i> ,9 <i>S</i> ,10 <i>S</i> ,1' <i>R</i> ,5' <i>S</i> ,6' <i>S</i> )-1-3 |          |          |
|---|-----------------------------------------------------------------------------------------------------------|----------|----------|-----------------------------------------------------------------------------------------------------------|----------|----------|-----------------------------------------------------------------------------------------------------------|----------|----------|
| C | 0.68799                                                                                                   | 0.52586  | 0.29894  | 0.68767                                                                                                   | 0.52835  | 0.29475  | 0.61818                                                                                                   | 0.43499  | 0.36721  |
| C | 2.15318                                                                                                   | 0.06146  | 0.63761  | 2.15302                                                                                                   | 0.06672  | 0.63648  | 2.10634                                                                                                   | 0.00625  | 0.65445  |
| C | 3.02152                                                                                                   | 0.4483   | -0.6079  | 3.02012                                                                                                   | 0.44133  | -0.61339 | 2.95766                                                                                                   | 0.60449  | -0.51682 |
| C | 2.92854                                                                                                   | 1.96497  | -0.87491 | 2.92798                                                                                                   | 1.95677  | -0.89287 | 2.77968                                                                                                   | 2.13673  | -0.57145 |
| C | 1.50008                                                                                                   | 2.40333  | -1.1499  | 1.49473                                                                                                   | 2.40154  | -1.1664  | 1.32299                                                                                                   | 2.52824  | -0.80244 |
| C | 0.5435                                                                                                    | 2.044    | 0.00004  | 0.53886                                                                                                   | 2.04306  | -0.01644 | 0.38985                                                                                                   | 1.96995  | 0.27405  |
| C | 2.11028                                                                                                   | -1.46217 | 0.89164  | 2.10971                                                                                                   | -1.45441 | 0.90475  | 2.14338                                                                                                   | -1.53772 | 0.69854  |
| C | 3.43078                                                                                                   | -2.17377 | 1.20664  | 3.43006                                                                                                   | -2.16383 | 1.2251   | 3.50017                                                                                                   | -2.21549 | 0.92059  |
| C | 4.2514                                                                                                    | -2.48272 | -0.0196  | 4.24889                                                                                                   | -2.48575 | 0.00096  | 4.33082                                                                                                   | -2.3115  | -0.33331 |
| O | 4.55282                                                                                                   | -1.50065 | -0.88979 | 4.54722                                                                                                   | -1.51301 | -0.8811  | 4.59285                                                                                                   | -1.20279 | -1.05073 |
| C | 4.49884                                                                                                   | -0.03703 | -0.68275 | 4.49628                                                                                                   | -0.04744 | -0.68825 | 4.45918                                                                                                   | 0.21305  | -0.64247 |



|   |          |          |          |         |          |          |         |          |          |
|---|----------|----------|----------|---------|----------|----------|---------|----------|----------|
| O | 4.60497  | -3.60643 | -0.29973 | 4.60323 | -3.61199 | -0.26726 | 4.72938 | -3.36783 | -0.77092 |
| C | 2.61342  | 0.73383  | 1.95404  | 2.6144  | 0.75103  | 1.94603  | 2.52668 | 0.51523  | 2.05484  |
| C | 5.42132  | 0.36687  | 0.46585  | 5.42295 | 0.366    | 0.45355  | 5.3549  | 0.50246  | 0.56075  |
| C | 5.14375  | 0.43373  | -1.99507 | 5.13727 | 0.40962  | -2.00732 | 5.08219 | 0.8945   | -1.87021 |
| C | -0.02674 | -0.25689 | -0.84649 | 0.02615 | -0.26227 | -0.84549 | 0.05239 | -0.22492 | -0.87845 |
| C | -1.37336 | -0.12382 | 1.10441  | 1.37358 | -0.11593 | 1.10437  | 1.40524 | -0.42748 | 1.06155  |
| O | -0.1436  | 0.2525   | 1.48568  | 0.14354 | 0.26279  | 1.48349  | 0.19853 | -0.03737 | 1.49935  |
| C | -1.33818 | -0.81121 | -0.23412 | 1.3381  | -0.81193 | -0.22968 | 1.32908 | -0.93132 | -0.35537 |
| C | -2.60628 | -0.42333 | -1.02275 | 2.60608 | -0.42921 | -1.0211  | 2.61777 | -0.51445 | -1.09584 |
| C | -3.85259 | -0.72411 | -0.16956 | 3.85251 | -0.72435 | -0.16605 | 3.8427  | -1.00591 | -0.29593 |
| C | -3.77544 | -0.21958 | 1.28797  | 3.77557 | -0.21053 | 1.28817  | 3.79747 | -0.68363 | 1.21101  |
| C | -2.47542 | 0.10062  | 1.85625  | 2.47553 | 0.11331  | 1.85461  | 2.51914 | -0.36183 | 1.82618  |
| C | -2.43202 | 0.72695  | 3.22144  | 2.43274 | 0.74849  | 3.21572  | 2.51444 | 0.08861  | 3.25949  |
| O | -4.81759 | -0.06216 | 1.91708  | 4.81759 | -0.04932 | 1.9164   | 4.84736 | -0.67408 | 1.84708  |
| C | -5.09227 | -0.10882 | -0.7924  | 5.09215 | -0.11306 | -0.79299 | 5.14511 | -0.46883 | -0.85885 |
| O | -6.10288 | -0.98364 | -0.85905 | 6.10232 | -0.98885 | -0.85546 | 5.14968 | 0.87309  | -0.87258 |
| O | -5.16266 | 1.03347  | -1.18432 | 5.16294 | 1.02697  | -1.19116 | 6.06181 | -1.14716 | -1.2574  |
| C | -7.34279 | -0.4782  | -1.39577 | 7.342   | -0.487   | -1.39613 | 6.34772 | 1.50021  | -1.36942 |
| C | -2.69642 | -1.08508 | -2.3982  | 2.69615 | -1.10051 | -2.39192 | 2.67036 | -0.98606 | -2.54887 |
| C | -1.23569 | -2.33686 | -0.01219 | 1.23592 | -2.33612 | 0.00245  | 1.13826 | -2.46407 | -0.33565 |
| C | 0.65544  | 3.00921  | 1.18531  | 0.64682 | 3.01547  | 1.16451  | 0.44474 | 2.7687   | 1.58147  |
| O | 1.53759  | 3.80777  | -1.40713 | 1.42976 | 3.78654  | -1.50694 | 1.15747 | 3.94648  | -0.8341  |
| H | 1.44283  | -1.626   | 1.73948  | 1.44281 | -1.61006 | 1.75452  | 1.48736 | -1.8498  | 1.51298  |
| H | 1.6614   | -1.98071 | 0.04497  | 1.65972 | -1.98021 | 0.06319  | 1.72078 | -1.95914 | -0.21298 |
| H | 2.55724  | -0.05027 | -1.46687 | 2.55257 | -0.06192 | -1.46779 | 2.52323 | 0.20569  | -1.44127 |
| H | 1.16517  | 1.89055  | -2.06016 | 1.15902 | 1.89747  | -2.07577 | 1.02261 | 2.11887  | -1.77532 |
| H | -0.48065 | 2.15623  | -0.37914 | 0.48135 | 2.1571   | -0.40072 | 0.63496 | 2.08286  | -0.09936 |
| H | 0.57975  | -1.05554 | -1.26375 | 0.58009 | -1.06446 | -1.25624 | 0.59842 | -0.92288 | -1.39728 |
| H | -0.25389 | 0.41668  | -1.67003 | 0.25283 | 0.40533  | -1.67416 | 0.3197  | 0.54102  | -1.60349 |
| H | -4.01531 | -1.80379 | -0.11418 | 4.01537 | -1.80364 | -0.10369 | 3.92181 | -2.09304 | -0.38083 |
| H | -2.57328 | 0.66207  | -1.16266 | 2.57303 | 0.65516  | -1.16847 | 2.64344 | 0.57941  | -1.08611 |
| H | 3.33536  | 2.5425   | -0.04207 | 3.34658 | 2.53344  | -0.06308 | 3.14885 | 2.61709  | 0.33676  |
| H | 3.51118  | 2.23949  | -1.7511  | 3.50759 | 2.22413  | -1.77327 | 3.35651 | 2.55502  | -1.39525 |
| H | 3.21456  | -3.13912 | 1.66325  | 3.21362 | -3.12442 | 1.69153  | 3.33609 | -3.24365 | 1.24147  |
| H | 4.03285  | -1.62672 | 1.93248  | 4.03362 | -1.61035 | 1.9448   | 4.0747  | -1.73985 | 1.71545  |
| H | 3.06649  | 1.70959  | 1.80722  | 3.35593 | 0.15293  | 2.46955  | 2.93019 | 1.52326  | 2.04676  |
| H | 1.77142  | 0.85327  | 2.63222  | 3.05857 | 1.72988  | 1.79188  | 1.67704 | 0.4992   | 2.73372  |
| H | 3.3467   | 0.12569  | 2.47782  | 1.77483 | 0.86678  | 2.62797  | 3.28797 | -0.1214  | 2.49911  |
| H | 6.43778  | 0.03613  | 0.24469  | 6.43792 | 0.03049  | 0.23284  | 5.30992 | 1.56452  | 0.80716  |
| H | 5.13711  | -0.0431  | 1.42862  | 5.1406  | -0.03351 | 1.42126  | 6.38872 | 0.26177  | 0.30629  |
| H | 5.43719  | 1.45361  | 0.56218  | 5.44224 | 1.45363  | 0.53903  | 5.09168 | -0.05203 | 1.45473  |
| H | 6.05188  | -0.14592 | -2.16074 | 5.41498 | 1.46216  | -1.97873 | 5.30458 | 1.94356  | -1.68118 |
| H | 4.4758   | 0.27533  | -2.84425 | 6.04421 | -0.17258 | -2.17035 | 6.01933 | 0.39038  | -2.10618 |
| H | 5.42018  | 1.4862   | -1.955   | 4.46629 | 0.24352  | -2.85262 | 4.42564 | 0.82237  | -2.73979 |

|   |          |          |          |         |          |          |         |          |          |
|---|----------|----------|----------|---------|----------|----------|---------|----------|----------|
| H | -3.07389 | 1.61026  | 3.26764  | 3.06474 | 1.63942  | 3.25236  | 1.51613 | 0.39043  | 3.57345  |
| H | -2.79824 | 0.03067  | 3.98151  | 2.81134 | 0.0615   | 3.97806  | 3.19713 | 0.92927  | 3.40707  |
| H | -1.41676 | 1.01828  | 3.48738  | 1.41587 | 1.03028  | 3.48576  | 2.85381 | -0.71345 | 3.92128  |
| H | -7.19652 | -0.12315 | -2.41537 | 7.7153  | 0.33043  | -0.77994 | 6.16289 | 2.56877  | -1.30731 |
| H | -8.03017 | -1.31894 | -1.37763 | 7.19503 | -0.1379  | -2.41767 | 6.53094 | 1.20174  | -2.40124 |
| H | -7.71529 | 0.33572  | -0.77446 | 8.02908 | -1.32788 | -1.3736  | 7.20063 | 1.22188  | -0.75092 |
| H | -3.53034 | -0.67218 | -2.97015 | 1.78724 | -0.93578 | -2.97501 | 2.75915 | -2.07244 | -2.61926 |
| H | -1.78757 | -0.91609 | -2.98018 | 2.85047 | -2.17843 | -2.30554 | 3.52913 | -0.5514  | -3.06592 |
| H | -2.85044 | -2.16361 | -2.31935 | 3.52985 | -0.69132 | -2.96683 | 1.77436 | -0.68397 | -3.09574 |
| H | -0.42211 | -2.57686 | 0.67083  | 2.15083 | -2.7441  | 0.43237  | 2.02659 | -2.98065 | 0.02784  |
| H | -2.15035 | -2.74807 | 0.4152   | 1.0386  | -2.85115 | -0.93942 | 0.9125  | -2.83131 | -1.33838 |
| H | -1.03843 | -2.84548 | -0.95757 | 0.42264 | -2.57176 | 0.68736  | 0.31194 | -2.74481 | 0.31552  |
| H | 1.67977  | 3.19653  | 1.50004  | 1.66971 | 3.21657  | 1.48063  | 0.01569 | 3.74193  | 1.41308  |
| H | 0.09553  | 2.63644  | 2.04227  | 0.09951 | 2.64099  | 2.02818  | 1.45494 | 2.94929  | 1.94235  |
| H | 0.22882  | 3.97111  | 0.89947  | 0.196   | 3.96842  | 0.88171  | 0.11321 | 2.26031  | 2.36705  |
| H | 0.65802  | 4.08913  | -1.68579 | 1.81297 | 4.2986   | -0.78452 | 1.66433 | 4.28725  | -1.58029 |

**Table S5.** Optimized cartesian coordinates of conformers of (5*R*,7*S*,8*S*,9*S*,10*S*,1'*S*,5'*R*,6'*R*)-1 at B3LYP/6-311G(d) level in methanol.

|   | (5 <i>R</i> ,7 <i>S</i> ,8 <i>S</i> ,9 <i>S</i> ,10 <i>S</i> ,1' <i>S</i> ,5' <i>R</i> ,6' <i>R</i> )-1-1 |          |          | (5 <i>R</i> ,7 <i>S</i> ,8 <i>S</i> ,9 <i>S</i> ,10 <i>S</i> ,1' <i>S</i> ,5' <i>R</i> ,6' <i>R</i> )-1-2 |          |          | (5 <i>R</i> ,7 <i>S</i> ,8 <i>S</i> ,9 <i>S</i> ,10 <i>S</i> ,1' <i>S</i> ,5' <i>R</i> ,6' <i>R</i> )-1-3 |          |          | (5 <i>R</i> ,7 <i>S</i> ,8 <i>S</i> ,9 <i>S</i> ,10 <i>S</i> ,1' <i>S</i> ,5' <i>R</i> ,6' <i>R</i> )-1-4 |          |          |
|---|-----------------------------------------------------------------------------------------------------------|----------|----------|-----------------------------------------------------------------------------------------------------------|----------|----------|-----------------------------------------------------------------------------------------------------------|----------|----------|-----------------------------------------------------------------------------------------------------------|----------|----------|
| C | -0.98591                                                                                                  | -1.18765 | 0.08144  | -0.98574                                                                                                  | -1.18668 | 0.08447  | -0.95854                                                                                                  | -1.21887 | 0.0872   | -0.98678                                                                                                  | -1.18692 | 0.07967  |
| C | -1.86779                                                                                                  | 0.0062   | 0.63659  | -1.86899                                                                                                  | 0.00679  | 0.6367   | -1.78257                                                                                                  | 0.01045  | 0.65208  | -1.87019                                                                                                  | 0.00453  | 0.63563  |
| C | -2.93023                                                                                                  | 0.29938  | -0.47551 | -2.92819                                                                                                  | 0.29874  | -0.47903 | -2.85255                                                                                                  | 0.33906  | -0.4429  | -2.92484                                                                                                  | 0.30443  | -0.48209 |
| C | -3.76269                                                                                                  | -0.97192 | -0.74944 | -3.76309                                                                                                  | -0.96888 | -0.75767 | -3.74412                                                                                                  | -0.89641 | -0.69359 | -3.76167                                                                                                  | -0.96126 | -0.76857 |
| C | -2.89112                                                                                                  | -2.13253 | -1.22157 | -2.89833                                                                                                  | -2.12772 | -1.22479 | -2.93705                                                                                                  | -2.10047 | -1.1693  | -2.89812                                                                                                  | -2.12953 | -1.23463 |
| C | -1.77299                                                                                                  | -2.48151 | -0.23497 | -1.77495                                                                                                  | -2.47857 | -0.23211 | -1.80017                                                                                                  | -2.48258 | -0.20453 | -1.77236                                                                                                  | -2.47856 | -0.24491 |
| C | -0.91477                                                                                                  | 1.19433  | 0.91736  | -0.917                                                                                                    | 1.19523  | 0.91952  | -0.77933                                                                                                  | 1.16187  | 0.90933  | -0.91745                                                                                                  | 1.18989  | 0.92863  |
| C | -1.53897                                                                                                  | 2.51446  | 1.38343  | -1.54282                                                                                                  | 2.51528  | 1.38353  | -1.34328                                                                                                  | 2.50766  | 1.37882  | -1.54275                                                                                                  | 2.50868  | 1.39681  |
| C | -2.12808                                                                                                  | 3.32856  | 0.26046  | -2.12955                                                                                                  | 3.32868  | 0.25882  | -1.91745                                                                                                  | 3.33912  | 0.26089  | -2.12277                                                                                                  | 3.32943  | 0.27393  |
| O | -3.06089                                                                                                  | 2.78699  | -0.54483 | -3.0595                                                                                                   | 2.78605  | -0.54899 | -2.88104                                                                                                  | 2.82921  | -0.52875 | -3.04907                                                                                                  | 2.79241  | -0.54212 |
| C | -3.84735                                                                                                  | 1.5502   | -0.34563 | -3.84632                                                                                                  | 1.54935  | -0.35158 | -3.71501                                                                                                  | 1.62772  | -0.30823 | -3.84006                                                                                                  | 1.55704  | -0.35375 |
| O | -1.75384                                                                                                  | 4.45164  | 0.00539  | -1.75544                                                                                                  | 4.45198  | 0.00449  | -1.50433                                                                                                  | 4.44582  | -0.00525 | -1.74612                                                                                                  | 4.45367  | 0.02808  |
| C | -2.48814                                                                                                  | -0.39398 | 1.99667  | -2.49285                                                                                                  | -0.39326 | 1.99517  | -2.39248                                                                                                  | -0.3595  | 2.02516  | -2.4989                                                                                                   | -0.40257 | 1.98952  |
| C | -4.69876                                                                                                  | 1.65886  | 0.91812  | -4.70109                                                                                                  | 1.65811  | 0.9099   | -4.54159                                                                                                  | 1.78045  | 0.9674   | -4.70036                                                                                                  | 1.66281  | 0.90424  |
| C | -4.78705                                                                                                  | 1.64455  | -1.55724 | -4.78306                                                                                                  | 1.6431   | -1.56555 | -4.66839                                                                                                  | 1.75205  | -1.50639 | -4.77058                                                                                                  | 1.65796  | -1.57192 |
| C | -0.09898                                                                                                  | -0.80621 | -1.14177 | -0.09853                                                                                                  | -0.80644 | -1.13891 | -0.08783                                                                                                  | -0.87875 | -1.15936 | -0.09931                                                                                                  | -0.80178 | -1.14159 |
| C | 1.23426                                                                                                   | -1.19436 | 0.77231  | 1.2346                                                                                                    | -1.19223 | 0.77577  | 1.27561                                                                                                   | -1.30015 | 0.72683  | 1.23332                                                                                                   | -1.19612 | 0.77175  |
| O | -0.01455                                                                                                  | -1.50886 | 1.14176  | -0.01421                                                                                                  | -1.50602 | 1.14596  | 0.02517                                                                                                   | -1.56862 | 1.12756  | -0.01606                                                                                                  | -1.51011 | 1.14086  |
| C | 1.35527                                                                                                   | -1.12917 | -0.72355 | 1.35552                                                                                                   | -1.12987 | -0.72033 | 1.36336                                                                                                   | -1.25187 | -0.77286 | 1.35431                                                                                                   | -1.12885 | -0.72418 |
| C | 2.37373                                                                                                   | -0.03566 | -1.10028 | 2.37439                                                                                                   | -0.03753 | -1.09939 | 2.40918                                                                                                   | -0.19522 | -1.18055 | 2.374                                                                                                     | -0.03594 | -1.09948 |
| C | 3.69126                                                                                                   | -0.28097 | -0.3425  | 3.69189                                                                                                   | -0.28143 | -0.34113 | 3.7366                                                                                                    | -0.4893  | -0.4521  | 3.69127                                                                                                   | -0.28299 | -0.34183 |
| C | 3.51814                                                                                                   | -0.53212 | 1.17109  | 3.51873                                                                                                   | -0.52943 | 1.17298  | 3.58998                                                                                                   | -0.71605 | 1.06567  | 3.5177                                                                                                    | -0.53581 | 1.17132  |
| C | 2.22471                                                                                                   | -0.97075 | 1.66716  | 2.22519                                                                                                   | -0.9668  | 1.66998  | 2.29308                                                                                                   | -1.10148 | 1.59676  | 2.22381                                                                                                   | -0.97427 | 1.66679  |

|   |          |          |          |          |          |          |          |          |          |          |          |          |
|---|----------|----------|----------|----------|----------|----------|----------|----------|----------|----------|----------|----------|
| C | 2.03642  | -1.09692 | 3.15254  | 2.03701  | -1.08947 | 3.15568  | 2.13535  | -1.20644 | 3.08726  | 2.03565  | -1.10174 | 3.15207  |
| O | 4.46905  | -0.32833 | 1.92072  | 4.46957  | -0.32414 | 1.92223  | 4.56696  | -0.54461 | 1.78949  | 4.46842  | -0.3335  | 1.92147  |
| C | 4.632    | 0.89927  | -0.49872 | 4.63255  | 0.89862  | -0.4997  | 4.765    | 0.60353  | -0.6737  | 4.63218  | 0.89737  | -0.49656 |
| O | 5.86949  | 0.5097   | -0.82794 | 5.87018  | 0.50851  | -0.82777 | 4.29283  | 1.79775  | -0.28382 | 5.8693   | 0.50833  | -0.82782 |
| O | 4.30702  | 2.05455  | -0.34696 | 4.30734  | 2.05417  | -0.35056 | 5.86358  | 0.4384   | -1.14803 | 4.30745  | 2.05238  | -0.34226 |
| C | 6.85039  | 1.55966  | -0.95544 | 6.85091  | 1.55841  | -0.95739 | 5.18997  | 2.91545  | -0.42845 | 6.8499   | 1.55866  | -0.95515 |
| C | 2.60048  | 0.09143  | -2.60685 | 2.60113  | 0.08619  | -2.60625 | 2.60459  | -0.07867 | -2.69184 | 2.60096  | 0.09265  | -2.6059  |
| C | 1.76333  | -2.52518 | -1.24806 | 1.76305  | -2.52695 | -1.24233 | 1.70901  | -2.66448 | -1.29613 | 1.7606   | -2.5244  | -1.25106 |
| C | -2.26147 | -3.30778 | 0.96087  | -2.26804 | -3.30483 | 0.96106  | -2.28916 | -3.28603 | 1.00707  | -2.2608  | -3.31229 | 0.94623  |
| O | -3.66324 | -3.31407 | -1.43916 | -3.77489 | -3.23028 | -1.46047 | -3.78052 | -3.21311 | -1.46692 | -3.69218 | -3.26957 | -1.5634  |
| H | -0.22358 | 0.8773   | 1.69979  | -0.22778 | 0.87865  | 1.70387  | -0.08712 | 0.82203  | 1.6811   | -0.23215 | 0.86799  | 1.71415  |
| H | -0.29709 | 1.42338  | 0.04885  | -0.29711 | 1.4241   | 0.05248  | -0.16902 | 1.36201  | 0.02844  | -0.29349 | 1.42176  | 0.06534  |
| H | -2.36541 | 0.50721  | -1.39174 | -2.36063 | 0.50776  | -1.39309 | -2.29673 | 0.51617  | -1.37076 | -2.3541  | 0.514    | -1.39398 |
| H | -2.43358 | -1.8329  | -2.17317 | -2.44036 | -1.83522 | -2.17813 | -2.50048 | -1.84292 | -2.13736 | -2.4475  | -1.84645 | -2.18903 |
| H | -1.07109 | -3.12457 | -0.77466 | -1.06745 | -3.12095 | -0.76813 | -1.13753 | -3.15492 | -0.75735 | -1.07111 | -3.1198  | -0.78692 |
| H | -0.19688 | 0.24107  | -1.41429 | -0.19573 | 0.24095  | -1.41121 | -0.1534  | 0.16992  | -1.43617 | -0.19457 | 0.24722  | -1.40834 |
| H | -0.38223 | -1.37963 | -2.0211  | -0.38203 | -1.37939 | -2.01854 | -0.41225 | -1.4463  | -2.02852 | -0.3831  | -1.3699  | -2.02437 |
| H | 4.1978   | -1.16148 | -0.74715 | 4.19854  | -1.16269 | -0.74397 | 4.18729  | -1.39679 | -0.86337 | 4.19762  | -1.16312 | -0.74751 |
| H | 1.97251  | 0.91376  | -0.73124 | 1.97344  | 0.9128   | -0.7324  | 2.04572  | 0.76607  | -0.80528 | 1.97367  | 0.91345  | -0.7294  |
| H | -4.3327  | -1.27664 | 0.13024  | -4.33633 | -1.27057 | 0.1214   | -4.31213 | -1.1567  | 0.20382  | -4.34218 | -1.25262 | 0.11112  |
| H | -4.49203 | -0.78291 | -1.53633 | -4.48821 | -0.78709 | -1.54752 | -4.47793 | -0.69287 | -1.47    | -4.48252 | -0.77698 | -1.56175 |
| H | -0.75975 | 3.13868  | 1.81932  | -0.76494 | 3.13997  | 1.82114  | -0.53321 | 3.10249  | 1.79928  | -0.76546 | 3.12938  | 1.84105  |
| H | -2.28038 | 2.36392  | 2.16793  | -2.28614 | 2.36472  | 2.16624  | -2.0773  | 2.38996  | 2.17573  | -2.28961 | 2.35568  | 2.17568  |
| H | -2.67523 | 0.47749  | 2.61957  | -1.80628 | -1.02689 | 2.55223  | -2.5441  | 0.52203  | 2.64346  | -2.69684 | 0.46602  | 2.61293  |
| H | -3.43313 | -0.92098 | 1.90722  | -2.68097 | 0.4782   | 2.61779  | -3.35429 | -0.85888 | 1.95667  | -3.44017 | -0.93508 | 1.89228  |
| H | -1.79981 | -1.02716 | 2.552    | -3.43802 | -0.91953 | 1.90326  | -1.71381 | -1.00785 | 2.57508  | -1.81068 | -1.0324  | 2.54898  |
| H | -4.12667 | 1.74978  | 1.83473  | -5.33426 | 0.77421  | 1.00245  | -5.21356 | 0.92739  | 1.07491  | -5.33757 | 0.78109  | 0.98992  |
| H | -5.33172 | 0.77497  | 1.01231  | -5.35333 | 2.52964  | 0.82922  | -5.1543  | 2.68078  | 0.89398  | -5.34897 | 2.5371   | 0.82457  |
| H | -5.35106 | 2.53052  | 0.83941  | -4.13155 | 1.74926  | 1.82809  | -3.95267 | 1.84844  | 1.8753   | -4.13486 | 1.74765  | 1.82552  |
| H | -5.61851 | 0.94561  | -1.47979 | -5.19499 | 2.6515   | -1.60663 | -5.04011 | 2.77593  | -1.54716 | -5.18076 | 2.66715  | -1.61038 |
| H | -5.1993  | 2.65286  | -1.59677 | -4.24507 | 1.4541   | -2.49682 | -4.15476 | 1.53586  | -2.44544 | -4.22821 | 1.47246  | -2.50132 |
| H | -4.25125 | 1.45646  | -2.48999 | -5.61453 | 0.94411  | -1.48974 | -5.52595 | 1.08771  | -1.41184 | -5.60357 | 0.95996  | -1.50362 |
| H | 2.35165  | -0.18388 | 3.66351  | 0.99511  | -1.28791 | 3.40429  | 2.72307  | -2.03818 | 3.48693  | 2.64697  | -1.91347 | 3.55735  |
| H | 0.9942   | -1.29422 | 3.40069  | 2.64584  | -1.90195 | 3.56328  | 2.49486  | -0.30023 | 3.58089  | 2.34629  | -0.18728 | 3.66338  |
| H | 2.64376  | -1.91161 | 3.55798  | 2.35055  | -0.17451 | 3.66428  | 1.09301  | -1.36402 | 3.36194  | 0.99434  | -1.30404 | 3.39996  |
| H | 6.96348  | 2.08349  | -0.00672 | 7.77591  | 1.0585   | -1.22973 | 6.08387  | 2.75904  | 0.17483  | 7.77429  | 1.05974  | -1.23133 |
| H | 7.77515  | 1.06019  | -1.22941 | 6.55121  | 2.26183  | -1.73358 | 5.4711   | 3.0421   | -1.47355 | 6.54871  | 2.2652   | -1.72791 |
| H | 6.55053  | 2.26505  | -1.72978 | 6.96345  | 2.08458  | -0.00989 | 4.63586  | 3.77983  | -0.07394 | 6.96437  | 2.08102  | -0.00579 |
| H | 1.6541   | 0.20756  | -3.14012 | 3.21101  | 0.96329  | -2.83286 | 1.65052  | 0.06958  | -3.20284 | 3.21148  | 0.97008  | -2.82948 |
| H | 3.11313  | -0.78244 | -3.01527 | 1.6548   | 0.20147  | -3.1398  | 3.07764  | -0.96993 | -3.11013 | 1.65476  | 0.2104   | -3.13911 |
| H | 3.21009  | 0.96922  | -2.83153 | 3.11353  | -0.78874 | -3.01275 | 3.23975  | 0.77645  | -2.93441 | 3.11274  | -0.78127 | -3.01528 |
| H | 1.09194  | -3.2931  | -0.86227 | 2.77546  | -2.79572 | -0.93988 | 1.63446  | -2.69551 | -2.38428 | 2.77283  | -2.79485 | -0.94947 |
| H | 1.70953  | -2.55262 | -2.33751 | 1.09307  | -3.29452 | -0.8533  | 2.71485  | -2.97188 | -1.009   | 1.09004  | -3.29285 | -0.86492 |

|   |          |          |          |          |          |          |          |          |          |          |          |          |
|---|----------|----------|----------|----------|----------|----------|----------|----------|----------|----------|----------|----------|
| H | 2.77505  | -2.79519 | -0.94442 | 1.70743  | -2.55703 | -2.33162 | 1.0162   | -3.40425 | -0.89359 | 1.70501  | -2.55062 | -2.34043 |
| H | -2.5105  | -4.31024 | 0.61402  | -1.48864 | -3.38964 | 1.71822  | -2.55918 | -4.29204 | 0.68107  | -3.15635 | -2.91979 | 1.42597  |
| H | -3.15061 | -2.90277 | 1.43885  | -2.51316 | -4.31074 | 0.61906  | -3.15826 | -2.85669 | 1.50368  | -1.48381 | -3.39199 | 1.7057   |
| H | -1.47684 | -3.39385 | 1.71248  | -3.16188 | -2.90164 | 1.43152  | -1.49737 | -3.3861  | 1.74862  | -2.48661 | -4.32359 | 0.60341  |
| H | -4.30202 | -3.12645 | -2.13653 | -3.26274 | -3.94748 | -1.85269 | -4.27722 | -3.44312 | -0.67229 | -4.20334 | -3.52275 | -0.7851  |

**Table S6.** Conformational analysis of the optimized isomers of **2** in chloroform

| Conformations | $G$<br>(hartree) | $\Delta G$<br>(kcal/mol) | Boltzmann<br>distributions (%) |
|---------------|------------------|--------------------------|--------------------------------|
| <b>2-1</b>    | -1579.501745     | 0                        | 79.8                           |
| <b>2-2</b>    | -1579.499694     | 1.287021779              | 9.1                            |
| <b>2-3</b>    | -1579.498935     | 1.763301414              | 4.1                            |
| <b>2-4</b>    | -1579.498698     | 1.912021142              | 3.2                            |
| <b>2-5</b>    | -1579.498324     | 2.146709657              | 2.1                            |
| <b>2-6</b>    | -1579.498156     | 2.252131237              | 1.7                            |

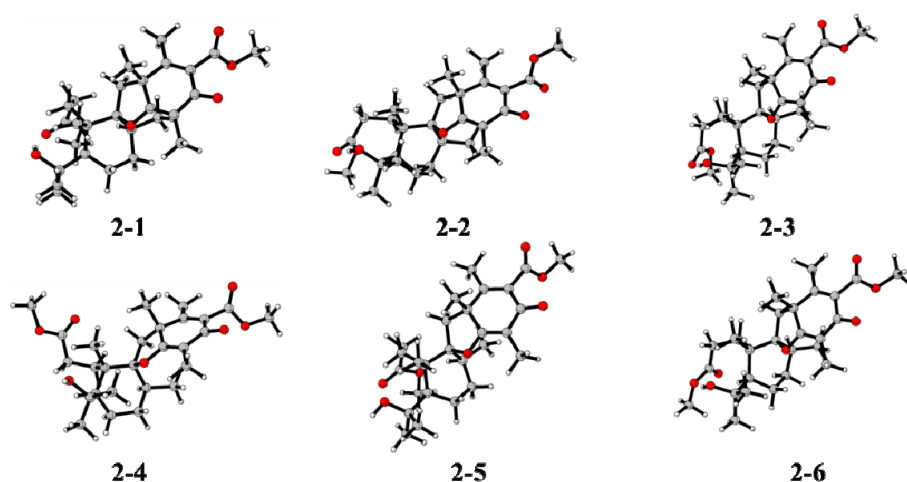

**Figure S20.** Optimized conformers of compound **2**

**Table S7.** Optimized cartesian coordinates of conformers of **2** at B3LYP/6-311G(d) level in chloroform.

|   | <b>2-1</b> |          |          | <b>2-2</b> |          |          | <b>2-3</b> |          |          |
|---|------------|----------|----------|------------|----------|----------|------------|----------|----------|
| C | -2.4531    | 0.67803  | 1.73141  | -2.45328   | -1.79266 | -0.30502 | -2.46501   | -1.76469 | -0.40323 |
| C | -2.62636   | 2.09034  | 1.15729  | -3.77853   | -2.03837 | -1.0599  | -3.83275   | -1.94836 | -1.0973  |
| C | -4.16583   | -3.0149  | 0.08247  | -2.26283   | 2.89103  | -1.12741 | -2.27839   | 2.96692  | -0.8817  |
| C | -4.2622    | -1.49621 | -0.06957 | -3.31256   | 1.89724  | -0.63639 | -3.30969   | 1.94537  | -0.4089  |
| C | -2.89413   | -0.78278 | -0.36096 | -2.74305   | 0.70314  | 0.20319  | -2.70742   | 0.68736  | 0.30525  |
| C | -1.91214   | -0.4793  | 0.83813  | -1.80235   | -0.39037 | -0.49131 | -1.81505   | -0.35446 | -0.52002 |
| C | -2.13347   | -1.47617 | -1.50246 | -2.19056   | 1.18811  | 1.55685  | -2.08008   | 1.06355  | 1.66103  |
| C | -1.13506   | -0.50478 | -2.14241 | -1.70203   | 0.01541  | 2.39612  | -1.55479   | -0.17228 | 2.37896  |
| C | -0.58569   | 0.5277   | -1.1388  | -0.51275   | -0.71559 | 1.74207  | -0.40728   | -0.85288 | 1.60687  |

|   |          |          |          |          |          |          |          |          |          |
|---|----------|----------|----------|----------|----------|----------|----------|----------|----------|
| C | -0.48078 | -0.12079 | 0.26144  | -0.40661 | -0.44561 | 0.21633  | -0.38284 | -0.4666  | 0.10295  |
| C | 0.446    | 0.66085  | 1.22796  | 0.63613  | -1.42602 | -0.39993 | 0.61836  | -1.3985  | -0.6431  |
| C | 1.79569  | -0.1039  | 1.23117  | 1.86014  | -0.55819 | -0.78646 | 1.82648  | -0.50716 | -1.0259  |
| C | 1.57045  | -1.1751  | 0.20554  | 1.52634  | 0.77016  | -0.17017 | 1.53321  | 0.77128  | -0.29407 |
| O | 0.26109  | -1.39905 | 0.04376  | 0.20558  | 0.89249  | 0.02083  | 0.22547  | 0.88111  | -0.02296 |
| C | 3.06747  | 0.67168  | 0.98848  | 3.22767  | -1.05172 | -0.37434 | 3.21058  | -1.03561 | -0.72364 |
| C | 4.04689  | 0.06687  | 0.29299  | 4.13557  | -0.13976 | 0.01081  | 4.14577  | -0.1563  | -0.32311 |
| C | 3.89742  | -1.27942 | -0.33511 | 3.83192  | 1.3111   | 0.16803  | 3.85754  | 1.28547  | -0.06222 |
| C | 2.55099  | -1.83192 | -0.44726 | 2.43086  | 1.7169   | 0.15472  | 2.45984  | 1.68978  | 0.04636  |
| C | 2.31449  | -2.98434 | -1.3782  | 2.0687   | 3.07942  | 0.66809  | 2.13734  | 3.01497  | 0.67164  |
| O | 4.88173  | -1.83756 | -0.82652 | 4.74698  | 2.10118  | 0.41744  | 4.7885   | 2.06557  | 0.15393  |
| C | 5.39319  | 0.6946   | 0.10153  | 5.54281  | -0.51385 | 0.3636   | 5.57706  | -0.55009 | -0.12416 |
| O | 5.56919  | 1.07662  | -1.17044 | 6.32278  | -0.58059 | -0.72522 | 5.90425  | -0.53773 | 1.17478  |
| O | 6.22085  | 0.84698  | 0.97092  | 5.93243  | -0.72857 | 1.48711  | 6.34691  | -0.84632 | -1.00947 |
| C | -5.23481 | -1.17555 | -1.21934 | -4.35819 | 2.65974  | 0.19981  | -4.29939 | 2.64862  | 0.53973  |
| O | -4.87189 | -1.02789 | 1.14871  | -3.99742 | 1.42202  | -1.81428 | -4.06361 | 1.56475  | -1.57908 |
| C | -3.82155 | 2.25791  | 0.25342  | -5.00919 | -1.49436 | -0.37808 | -5.01781 | -1.44755 | -0.30964 |
| O | -3.55025 | 3.03029  | -0.80262 | -5.22494 | -2.08923 | 0.79945  | -5.1687  | -2.11903 | 0.83648  |
| O | -4.92207 | 1.78045  | 0.45878  | -5.74055 | -0.62619 | -0.81932 | -5.7671  | -0.54917 | -0.6482  |
| C | -4.64091 | 3.28769  | -1.71443 | -6.35364 | -1.61713 | 1.56525  | -6.24493 | -1.69272 | 1.69865  |
| C | 0.69754  | 1.15873  | -1.68915 | 0.78842  | -0.40562 | 2.49275  | 0.9347   | -0.60381 | 2.30687  |
| C | 1.97785  | -0.81847 | 2.6077   | 1.93664  | -0.36836 | -2.33388 | 1.82372  | -0.20068 | -2.55635 |
| C | 3.19079  | 2.0254   | 1.61718  | 3.52291  | -2.51339 | -0.52355 | 3.47339  | -2.4872  | -0.98456 |
| C | 6.86097  | 1.63074  | -1.49198 | 7.70846  | -0.90963 | -0.49004 | 7.28192  | -0.83081 | 1.48348  |
| C | -1.76708 | -1.67449 | 1.79404  | -1.57554 | -0.17633 | -1.9992  | -1.67079 | -0.02886 | -2.018   |
| H | -1.81015 | 0.76763  | 2.60675  | -2.6224  | -2.00342 | 0.75098  | -2.57605 | -2.05487 | 0.64153  |
| H | -3.40985 | 0.34851  | 2.12485  | -1.74923 | -2.54988 | -0.65647 | -1.78757 | -2.49516 | -0.85066 |
| H | -1.73595 | 2.47269  | 0.66212  | -3.92046 | -3.11977 | -1.13637 | -3.98895 | -3.02079 | -1.24222 |
| H | -2.81229 | 2.76424  | 2.00169  | -3.74958 | -1.64106 | -2.07211 | -3.85734 | -1.48009 | -2.07888 |
| H | -3.77151 | -3.48039 | -0.82142 | -2.76092 | 3.70915  | -1.65357 | -2.79603 | 3.82897  | -1.30975 |
| H | -5.16742 | -3.41403 | 0.25768  | -1.55088 | 2.4351   | -1.80966 | -1.61465 | 2.56124  | -1.64008 |
| H | -3.53799 | -3.30918 | 0.91973  | -1.7058  | 3.31481  | -0.29131 | -1.66679 | 3.31714  | -0.04974 |
| H | -3.18401 | 0.1919   | -0.76296 | -3.6435  | 0.15382  | 0.48541  | -3.59692 | 0.12302  | 0.59207  |
| H | -1.61128 | -2.35237 | -1.11711 | -1.38416 | 1.90842  | 1.41669  | -1.27768 | 1.79088  | 1.53452  |
| H | -2.82332 | -1.83852 | -2.2652  | -2.98373 | 1.69872  | 2.10314  | -2.83955 | 1.53144  | 2.28755  |
| H | -1.61439 | 0.04185  | -2.96082 | -2.53558 | -0.67788 | 2.55044  | -2.38332 | -0.8735  | 2.52395  |
| H | -0.30346 | -1.0607  | -2.58324 | -1.41415 | 0.36523  | 3.39112  | -1.21156 | 0.09832  | 3.38108  |
| H | -1.31906 | 1.33213  | -1.04795 | -0.68212 | -1.79341 | 1.82268  | -0.57828 | -1.93345 | 1.61408  |
| H | 0.55063  | 1.6945   | 0.91003  | 0.90153  | -2.18698 | 0.33052  | 0.9162   | -2.21474 | 0.01087  |
| H | 0.05079  | 0.68474  | 2.23795  | 0.25121  | -1.94882 | -1.27043 | 0.18401  | -1.85095 | -1.52958 |
| H | 1.24969  | -3.19752 | -1.47111 | 0.98877  | 3.22465  | 0.66385  | 1.05997  | 3.16008  | 0.74682  |
| H | 2.71701  | -2.77538 | -2.37329 | 2.43529  | 3.2278   | 1.68836  | 2.56957  | 3.09515  | 1.67369  |
| H | 2.81468  | -3.88851 | -1.01898 | 2.52336  | 3.8612   | 0.05339  | 2.55497  | 3.83588  | 0.08222  |
| H | -6.19762 | -1.65095 | -1.01958 | -5.08888 | 1.97184  | 0.63573  | -5.01144 | 1.93388  | 0.96318  |

|   |          |          |          |          |          |          |          |          |          |
|---|----------|----------|----------|----------|----------|----------|----------|----------|----------|
| H | -4.87735 | -1.53094 | -2.18707 | -4.89219 | 3.34384  | -0.4624  | -4.86276 | 3.38414  | -0.03764 |
| H | -5.39795 | -0.09804 | -1.29106 | -3.91595 | 3.24729  | 1.00515  | -3.80675 | 3.17073  | 1.36076  |
| H | -5.07104 | -0.08538 | 1.02977  | -4.70205 | 0.81364  | -1.53761 | -4.75734 | 0.94071  | -1.3102  |
| H | -4.96321 | 2.35805  | -2.18189 | -6.36478 | -2.22499 | 2.46499  | -6.21451 | -2.36561 | 2.55038  |
| H | -5.47589 | 3.7428   | -1.18425 | -6.22182 | -0.56475 | 1.81472  | -6.08245 | -0.66344 | 2.01738  |
| H | -4.2383  | 3.96906  | -2.45784 | -7.2747  | -1.74837 | 0.99941  | -7.19851 | -1.77067 | 1.17885  |
| H | 1.50667  | 0.43259  | -1.78115 | 0.70831  | -0.77037 | 3.51917  | 1.12799  | 0.46411  | 2.4218   |
| H | 1.05774  | 1.9947   | -1.08726 | 0.97305  | 0.66916  | 2.53566  | 1.78699  | -1.04198 | 1.78225  |
| H | 0.49897  | 1.55031  | -2.69023 | 1.66879  | -0.87767 | 2.05061  | 0.90836  | -1.04634 | 3.30513  |
| H | 1.12539  | -1.46737 | 2.80959  | 2.76242  | 0.29333  | -2.59421 | 1.94728  | -1.12677 | -3.12083 |
| H | 2.88544  | -1.4215  | 2.61182  | 2.09223  | -1.33373 | -2.81918 | 0.88368  | 0.25474  | -2.85853 |
| H | 2.04033  | -0.07852 | 3.40782  | 1.01291  | 0.05659  | -2.71894 | 2.63881  | 0.47684  | -2.80953 |
| H | 2.60556  | 2.75951  | 1.05395  | 3.10065  | -3.07419 | 0.31647  | 3.01656  | -2.80784 | -1.92416 |
| H | 2.79387  | 2.02474  | 2.6354   | 3.07129  | -2.91957 | -1.43151 | 4.53701  | -2.71269 | -1.02909 |
| H | 4.22189  | 2.37143  | 1.6535   | 4.59275  | -2.71748 | -0.55622 | 3.02751  | -3.10093 | -0.19541 |
| H | 7.0443   | 2.53103  | -0.90609 | 8.17301  | -0.92182 | -1.47172 | 7.93598  | -0.10056 | 1.00751  |
| H | 7.64286  | 0.89852  | -1.29178 | 8.17041  | -0.15398 | 0.14461  | 7.35658  | -0.76334 | 2.565    |
| H | 6.81926  | 1.86573  | -2.55163 | 7.78914  | -1.88656 | -0.01435 | 7.54256  | -1.83238 | 1.1425   |
| H | -2.71409 | -1.85829 | 2.29782  | -1.17731 | -1.08029 | -2.46384 | -2.61532 | 0.28149  | -2.44687 |
| H | -1.4557  | -2.58134 | 1.28063  | -2.49616 | 0.09003  | -2.50316 | -0.96778 | 0.78342  | -2.17749 |
| H | -1.0222  | -1.46097 | 2.5636   | -0.8705  | 0.62978  | -2.17966 | -1.31038 | -0.89791 | -2.57161 |

|   | 2-4     |          |          | 2-5      |          |          | 2-6      |          |          |
|---|---------|----------|----------|----------|----------|----------|----------|----------|----------|
| C | 2.67694 | 0.84113  | 1.49073  | -2.49873 | 0.66424  | 1.75879  | -2.40944 | -1.88601 | -0.11739 |
| C | 4.0359  | 1.47295  | 1.16878  | -2.54102 | 2.12807  | 1.27461  | -3.81075 | -2.1227  | -0.71628 |
| C | 1.94671 | -2.94887 | -1.42452 | -4.12651 | -3.04819 | -0.15405 | -2.30558 | 2.75548  | -1.12098 |
| C | 3.17179 | -2.41695 | -0.68016 | -4.27563 | -1.52322 | -0.05441 | -3.31008 | 1.79578  | -0.48861 |
| C | 2.93041 | -1.47561 | 0.54834  | -2.95974 | -0.72797 | -0.34421 | -2.68405 | 0.62365  | 0.33827  |
| C | 2.10408 | -0.12846 | 0.40115  | -1.95029 | -0.4724  | 0.83998  | -1.7875  | -0.4846  | -0.38985 |
| C | 2.51156 | -2.23129 | 1.82895  | -2.23451 | -1.31947 | -1.56236 | -2.04774 | 1.13986  | 1.64267  |
| C | 1.00865 | -2.40226 | 1.99827  | -1.24203 | -0.3121  | -2.15142 | -1.48581 | -0.01    | 2.46742  |
| C | 0.28341 | -1.05666 | 2.00643  | -0.63788 | 0.63002  | -1.09252 | -0.33174 | -0.73483 | 1.74769  |
| C | 0.56934 | -0.27536 | 0.70256  | -0.52789 | -0.10406 | 0.26134  | -0.34303 | -0.50483 | 0.21144  |
| C | 0.21424 | 1.07153  | 0.67982  | 0.41584  | 0.60323  | 1.26792  | 0.66421  | -1.48905 | -0.45544 |
| C | 1.35558 | 0.87541  | -0.34902 | 1.74886  | -0.18831 | 1.22814  | 1.84331  | -0.61787 | -0.95733 |
| C | 1.2774  | -0.59271 | -0.64736 | 1.50627  | -1.18849 | 0.1361   | 1.5371   | 0.72325  | -0.35402 |
| O | 0.04951 | -1.06272 | -0.3884  | 0.19461  | -1.37755 | -0.04392 | 0.23324  | 0.83439  | -0.06485 |
| C | 2.74559 | 1.31465  | 0.04421  | 3.03483  | 0.5785   | 1.03542  | 3.24576  | -1.08344 | -0.63589 |
| C | 3.78296 | 0.56431  | -0.36732 | 4.0053   | 0.00112  | 0.30488  | 4.1691   | -0.14788 | -0.35288 |
| C | 3.62217 | -0.72572 | -1.10073 | 3.83347  | -1.30203 | -0.40387 | 3.85356  | 1.30661  | -0.23458 |
| C | 2.29707 | -1.33646 | -1.12234 | 2.47791  | -1.82079 | -0.55405 | 2.4498   | 1.69046  | -0.13098 |
| C | 2.17087 | -2.77683 | -1.52241 | 2.22429  | -2.90767 | -1.55667 | 2.11052  | 3.06579  | 0.3633   |
| O | 4.61289 | -1.28448 | -1.57918 | 4.80979  | -1.84841 | -0.92394 | 4.77096  | 2.12407  | -0.124   |
| C | 5.20466 | 0.97953  | -0.14484 | 5.36183  | 0.61689  | 0.15232  | 5.61419  | -0.48737 | -0.15289 |

|   |         |          |          |          |          |          |          |          |          |
|---|---------|----------|----------|----------|----------|----------|----------|----------|----------|
| O | 5.79969 | 0.19714  | 0.76544  | 5.55352  | 1.05376  | -1.09958 | 5.96968  | -0.34529 | 1.13092  |
| O | 5.75572 | 1.90068  | -0.70344 | 6.18496  | 0.71813  | 1.03362  | 6.37157  | -0.84651 | -1.02548 |
| C | 4.04506 | -3.61573 | -0.2646  | -5.35385 | -1.04674 | -1.03919 | -4.25924 | 2.61231  | 0.40921  |
| O | 3.97413 | -1.62515 | -1.58941 | -4.732   | -1.19751 | 1.27601  | -4.11114 | 1.27764  | -1.57457 |
| C | 3.93482 | 2.7094   | 0.30513  | -3.65115 | 2.42755  | 0.29485  | -4.93497 | -1.71662 | 0.20598  |
| O | 5.00025 | 2.83499  | -0.5029  | -3.18106 | 2.91306  | -0.87117 | -5.79881 | -0.85458 | -0.38291 |
| O | 3.03189 | 3.51587  | 0.34265  | -4.83038 | 2.27135  | 0.51617  | -5.07881 | -2.11181 | 1.33838  |
| C | 5.02426 | 4.00502  | -1.34432 | -4.16413 | 3.21161  | -1.88138 | -6.94    | -0.45683 | 0.41016  |
| C | 1.20586 | -1.2737  | 2.30282  | 0.65723  | 1.25003  | -1.62797 | 1.0139   | -0.37805 | 2.3916   |
| C | 1.02405 | 1.63477  | -1.67267 | 1.91749  | -0.98949 | 2.55754  | 1.80132  | -0.47281 | -2.51089 |
| C | 2.8819  | 2.60907  | 0.78596  | 3.17882  | 1.88923  | 1.74597  | 3.53753  | -2.54841 | -0.75111 |
| C | 7.19598 | 0.46097  | 1.01007  | 6.85525  | 1.60353  | -1.3858  | 7.36118  | -0.5748  | 1.43159  |
| C | 2.28143 | 0.51917  | -0.98106 | -1.79474 | -1.70016 | 1.75435  | -1.67954 | -0.31586 | -1.91699 |
| H | 2.76693 | 0.31402  | 2.43847  | -1.92893 | 0.6592   | 2.68953  | -2.4673  | -2.08858 | 0.95244  |
| H | 1.98223 | 1.66016  | 1.67375  | -3.51138 | 0.3755   | 2.0281   | -1.74378 | -2.64433 | -0.53414 |
| H | 4.73783 | 0.77351  | 0.71492  | -1.59046 | 2.47831  | 0.87833  | -3.93949 | -3.19824 | -0.86879 |
| H | 4.50042 | 1.80201  | 2.10521  | -2.75751 | 2.74169  | 2.15449  | -3.93096 | -1.64848 | -1.68755 |
| H | 1.35327 | -2.15018 | -1.85646 | -3.87496 | -3.36964 | -1.16561 | -2.84312 | 3.58354  | -1.5896  |
| H | 1.29928 | -3.5298  | -0.76693 | -5.07881 | -3.51883 | 0.10887  | -1.69867 | 2.27508  | -1.88248 |
| H | 2.27678 | -3.61371 | -2.23019 | -3.36748 | -3.42896 | 0.52644  | -1.63684 | 3.16894  | -0.36581 |
| H | 3.95341 | -1.13471 | 0.73238  | -3.30412 | 0.26009  | -0.65698 | -3.56606 | 0.08132  | 0.68695  |
| H | 3.00444 | -3.20041 | 1.87804  | -1.71111 | -2.22992 | -1.26846 | -1.26331 | 1.86824  | 1.43377  |
| H | 2.88947 | -1.68303 | 2.69664  | -2.95121 | -1.60902 | -2.33286 | -2.80861 | 1.65061  | 2.23287  |
| H | 0.80378 | -2.92421 | 2.93841  | -1.73822 | 0.30584  | -2.90679 | -2.29637 | -0.71177 | 2.68904  |
| H | 0.59028 | -3.02509 | 1.20285  | -0.43836 | -0.84607 | -2.66572 | -1.13756 | 0.36242  | 3.4345   |
| H | 0.69753 | -0.44623 | 2.81756  | -1.34056 | 1.44853  | -0.94056 | -0.47159 | -1.81298 | 1.86952  |
| H | 0.59375 | 1.29822  | 1.67339  | 0.54776  | 1.64834  | 1.00318  | 0.99454  | -2.22532 | 0.27367  |
| H | 0.41244 | 1.90881  | 0.38879  | 0.01454  | 0.58548  | 2.27639  | 0.22192  | -2.04158 | -1.2791  |
| H | 1.16461 | -3.14751 | -1.33018 | 2.6442   | -2.64861 | -2.53262 | 2.61134  | 3.27872  | 1.31214  |
| H | 2.88497 | -3.3997  | -0.97663 | 2.69732  | -3.84492 | -1.24878 | 2.44139  | 3.82977  | -0.34611 |
| H | 2.38553 | -2.9102  | -2.5869  | 1.15569  | -3.08737 | -1.67395 | 1.03564  | 3.17526  | 0.50532  |
| H | 4.88936 | -3.29599 | 0.35091  | -5.05905 | -1.19276 | -2.08031 | -4.93844 | 1.96285  | 0.96964  |
| H | 4.44732 | -4.0859  | -1.16642 | -5.55485 | 0.01343  | -0.87704 | -4.86158 | 3.25981  | -0.23048 |
| H | 3.48724 | -4.38285 | 0.27476  | -6.28407 | -1.60146 | -0.88065 | -3.72837 | 3.24298  | 1.12326  |
| H | 4.12871 | -2.15731 | -2.37926 | -5.59666 | -1.60916 | 1.39424  | -4.78041 | 0.68378  | -1.20422 |
| H | 4.17143 | 3.99783  | -2.02286 | -4.88807 | 3.93321  | -1.50506 | -7.54856 | -1.32785 | 0.64751  |
| H | 5.00016 | 4.90991  | -0.73782 | -3.60585 | 3.6271   | -2.71536 | -6.6108  | 0.02277  | 1.33092  |
| H | 5.95481 | 3.94266  | -1.90132 | -4.67966 | 2.30024  | -2.18412 | -7.49374 | 0.24122  | -0.2106  |
| H | 1.79828 | -0.35729 | 2.27653  | 1.06249  | 2.02856  | -0.97921 | 1.1779   | 0.70091  | 2.39182  |
| H | 1.31402 | -1.69589 | 3.30474  | 0.45308  | 1.71784  | -2.59478 | 1.86961  | -0.84474 | 1.89817  |
| H | 1.65298 | -1.97867 | 1.60034  | 1.4362   | 0.50284  | -1.78869 | 1.01738  | -0.71532 | 3.43048  |
| H | 0.07675 | 1.29032  | -2.08269 | 2.81651  | -1.60445 | 2.52487  | 0.84677  | -0.06726 | -2.83735 |
| H | 1.80653 | 1.46825  | -2.41276 | 1.98947  | -0.3014  | 3.40194  | 2.59763  | 0.18812  | -2.85229 |
| H | 0.94256 | 2.70591  | -1.47873 | 1.05607  | -1.63742 | 2.71835  | 1.93017  | -1.45073 | -2.97852 |

|   |         |          |          |          |          |          |          |          |          |
|---|---------|----------|----------|----------|----------|----------|----------|----------|----------|
| H | 2.58715 | 2.47985  | 1.8323   | 2.61551  | 2.66819  | 1.22173  | 3.05969  | -2.97764 | -1.63518 |
| H | 2.22155 | 3.37312  | 0.36832  | 2.76987  | 1.83611  | 2.758    | 4.60485  | -2.75323 | -0.80807 |
| H | 3.90054 | 2.99149  | 0.76592  | 4.21639  | 2.21012  | 1.81357  | 3.13378  | -3.08435 | 0.11379  |
| H | 7.33043 | 1.47495  | 1.38576  | 7.62567  | 0.8529   | -1.21088 | 7.98473  | 0.12474  | 0.87527  |
| H | 7.76815 | 0.33252  | 0.09151  | 6.82629  | 1.88465  | -2.43461 | 7.45765  | -0.40651 | 2.50032  |
| H | 7.50154 | -0.2671  | 1.75599  | 7.04514  | 2.4752   | -0.76004 | 7.64106  | -1.59669 | 1.1771   |
| H | 3.33225 | 0.59436  | -1.24237 | -2.7429  | -1.9219  | 2.23735  | -2.63602 | -0.06153 | -2.35689 |
| H | 1.8117  | -0.07107 | -1.7626  | -1.45963 | -2.57869 | 1.20708  | -0.98858 | 0.48042  | -2.17629 |
| H | 1.85428 | 1.52051  | -1.00277 | -1.0595  | -1.50295 | 2.53717  | -1.32138 | -1.23493 | -2.38425 |

**Table S8.**  $\alpha$ -Glucosidase and acetylcholinesterase inhibitory activities of all compounds (IC<sub>50</sub>,  $\mu$ M)

| Compounds        | $\alpha$ -glucosidase | acetylcholinesterase |
|------------------|-----------------------|----------------------|
| <b>1</b>         | >200                  | >200                 |
| <b>2</b>         | >200                  | >200                 |
| <b>3</b>         | >200                  | >200                 |
| <b>4</b>         | >200                  | >200                 |
| <b>5</b>         | >200                  | >200                 |
| <b>6</b>         | >200                  | >200                 |
| <b>7</b>         | >200                  | >200                 |
| <b>8</b>         | >200                  | >200                 |
| <b>9</b>         | 104.1                 | >200                 |
| <b>10</b>        | 111.3                 | >200                 |
| <b>11</b>        | >200                  | >200                 |
| <b>12</b>        | >200                  | >200                 |
| <b>13</b>        | >200                  | >200                 |
| <b>14</b>        | >200                  | >200                 |
| <b>15</b>        | >200                  | >200                 |
| <b>16</b>        | >200                  | >200                 |
| <b>17</b>        | >200                  | >200                 |
| <b>18</b>        | >200                  | >200                 |
| <b>Acarbose</b>  | 304.6                 |                      |
| <b>Genistein</b> | 19.95                 |                      |
| <b>Tacrine</b>   |                       | Undetermined         |

**Table S9.** Antibacterial activities of all compounds MIC ( $\mu$ g/mL)

| Compounds | <i>Staphylococcus aureus</i> | <i>Bacillus subtilis</i> | <i>Escherichia coli</i> | <i>Listeria monocytogenes</i> |
|-----------|------------------------------|--------------------------|-------------------------|-------------------------------|
| <b>1</b>  | >128                         | >128                     | >128                    | >128                          |
| <b>2</b>  | >128                         | >128                     | >128                    | >128                          |
| <b>3</b>  | >128                         | >128                     | >128                    | >128                          |
| <b>4</b>  | >128                         | >128                     | >128                    | >128                          |
| <b>5</b>  | 128                          | >128                     | >128                    | >128                          |
| <b>6</b>  | >128                         | >128                     | >128                    | >128                          |
| <b>7</b>  | >128                         | >128                     | >128                    | >128                          |
| <b>8</b>  | >128                         | >128                     | >128                    | >128                          |
| <b>9</b>  | >128                         | >128                     | >128                    | >128                          |
| <b>10</b> | >128                         | >128                     | >128                    | >128                          |
| <b>11</b> | >128                         | >128                     | >128                    | >128                          |
| <b>12</b> | 32                           | 16                       | >128                    | >128                          |
| <b>13</b> | >128                         | >128                     | >128                    | >128                          |
| <b>14</b> | >128                         | >128                     | >128                    | >128                          |



|                   |      |      |      |      |
|-------------------|------|------|------|------|
| <b>15</b>         | >128 | >128 | >128 | >128 |
| <b>16</b>         | >128 | >128 | >128 | >128 |
| <b>17</b>         | >128 | >128 | >128 | >128 |
| <b>18</b>         | >128 | >128 | >128 | >128 |
| <b>Ampicillin</b> | <1   | <1   | <1   | <1   |

**Table S10.** Antifungal activities of all compounds MIC ( $\mu\text{g/mL}$ )

| Compounds          | <i>Fusarium</i><br>oxysporum f. sp.<br>cubense | <i>Fusarium spp.</i> | <i>Peronophythora</i><br><i>litchii</i> | <i>Colletotrichum</i><br><i>gloeosporioides</i> | <i>Hylocereus</i><br><i>undatus</i> |
|--------------------|------------------------------------------------|----------------------|-----------------------------------------|-------------------------------------------------|-------------------------------------|
| <b>1</b>           | >128                                           | >128                 | >128                                    | >128                                            | >128                                |
| <b>2</b>           | >128                                           | >128                 | >128                                    | >128                                            | >128                                |
| <b>3</b>           | >128                                           | >128                 | >128                                    | >128                                            | >128                                |
| <b>4</b>           | >128                                           | >128                 | >128                                    | >128                                            | >128                                |
| <b>5</b>           | >128                                           | >128                 | >128                                    | >128                                            | >128                                |
| <b>6</b>           | >128                                           | >128                 | >128                                    | >128                                            | >128                                |
| <b>7</b>           | >128                                           | >128                 | >128                                    | >128                                            | >128                                |
| <b>8</b>           | >128                                           | >128                 | >128                                    | >128                                            | >128                                |
| <b>9</b>           | >128                                           | >128                 | >128                                    | >128                                            | >128                                |
| <b>10</b>          | >128                                           | >128                 | >128                                    | >128                                            | >128                                |
| <b>11</b>          | >128                                           | >128                 | >128                                    | >128                                            | >128                                |
| <b>12</b>          | >128                                           | >128                 | >128                                    | >128                                            | >128                                |
| <b>13</b>          | >128                                           | >128                 | >128                                    | >128                                            | >128                                |
| <b>14</b>          | >128                                           | >128                 | >128                                    | >128                                            | >128                                |
| <b>15</b>          | >128                                           | >128                 | >128                                    | >128                                            | >128                                |
| <b>16</b>          | >128                                           | >128                 | >128                                    | >128                                            | >128                                |
| <b>17</b>          | >128                                           | >128                 | >128                                    | >128                                            | >128                                |
| <b>18</b>          | >128                                           | >128                 | >128                                    | >128                                            | >128                                |
| <b>Carbendazim</b> | <1                                             | <1                   | <1                                      | <1                                              | <1                                  |
